# Supplementary material
Source: PubMed Central journal article supplement (PMC4285140)
Supplement: jo5022713_si_001.pdf [file jo5022713_si_001.pdf]

## Supporting Information

### A Combined Experimental and Computational Investigation on the Unusual Molecular Mechanism of the Lossen Rearrangement Reaction Activated by Carcinogenic Halogenated Quinones

*Guo-Qiang Shan,<sup>†,‡</sup> Ao Yu,<sup>\*,§</sup> Chuan-Fang Zhao,<sup>§</sup> Chun-Hua Huang,<sup>†</sup> Ling-Yan Zhu,<sup>‡</sup> Ben-Zhan Zhu<sup>\*,†,¶</sup>*

<sup>†</sup>State Key Laboratory of Environmental Chemistry and Ecotoxicology, Research Center for Eco-Environmental Sciences, Chinese Academy of Sciences, Beijing 100085, China

<sup>‡</sup>Key Laboratory of Pollution Processes and Environmental Criteria, Ministry of Education, Tianjin Key Laboratory of Environmental Remediation and Pollution Control, College of Environmental Science and Engineering, Nankai University, Tianjin 300071, China

<sup>§</sup>Central Laboratory, College of Chemistry, Collaborative Innovation Center of Chemical Science and Engineering (Tianjin), Nankai University, Tianjin 300071, China

<sup>¶</sup>Linus Pauling Institute, Oregon State University, Corvallis, Oregon 97331, United States

\*Corresponding author:

B. Zhu: bzhu@rcees.ac.cn

A. Yu: esr@nankai.edu.cn

## CONTENTS

|                                                                                                                                            |            |
|--------------------------------------------------------------------------------------------------------------------------------------------|------------|
| <b>1. Analysis of the reaction products of 2,5-DCBQ/BHA .....</b>                                                                          | <b>S3</b>  |
| <b>2. NMR identification of P<sub>1</sub> and P<sub>2</sub> .....</b>                                                                      | <b>S3</b>  |
| <b>3. Direct detection and identification of phenyl isocyanate from P<sub>1</sub> via pyrolysis by<br/>GC/MS .....</b>                     | <b>S3</b>  |
| <b>4. Analysis of the reaction products of other C<sub>n</sub>BQ/BHA by HPLC/MS.....</b>                                                   | <b>S4</b>  |
| <b>5. Experimental measurement of pK<sub>a</sub> values of P<sub>1</sub> and hydroxylated chloroquinoid<br/>products in solution .....</b> | <b>S6</b>  |
| <b>6. SI Figures and Tables .....</b>                                                                                                      | <b>S7</b>  |
| <b>SI References .....</b>                                                                                                                 | <b>S13</b> |
| <b>Cartesian coordinate of some key structures and IRC calculations for TS in Fig. 4 ...<br/>.....</b>                                     | <b>S14</b> |

**1. Analysis of the reaction products of 2,5-DCBQ/BHA.** The reaction of 2,5-DCBQ with BHA was firstly studied by electrospray ionization mass spectrometry (ESI-MS), since ESI is considered as a soft ionization mode for facile obtaining of the molecular ions.<sup>1</sup> A small portion (20  $\mu$ l) of reaction solution of 1 mM 2,5-DCBQ with 1, 2, or 4 mM BHA in 1 ml Chelex-treated  $\text{CH}_3\text{COONH}_4$  buffer at room temperature during the reaction period of 0-30 min were directly injected into MS. All other experimental parameters of MS are the same as described previously in ref. 2. The direct MS spectra of the reaction products of 2,5-DCBQ/BHA are shown in Fig. S1.

**2. NMR identification of  $P_1$  and  $P_2$ .** The  $^1\text{H}$ -NMR and  $^{13}\text{C}$ -NMR spectra for  $P_1$  and  $P_2$  using tetramethylsilane ( $(\text{CH}_3)_4\text{Si}$ ) as internal standard and  $\text{DMSO-}d_6$  as solvent were shown in Fig. S2 and S3, respectively, and the NMR assignments with chemical shifts were shown in Table S1.  $P_1$  or  $P_2$  was identified by  $^1\text{H}$ - and  $^{13}\text{C}$ -NMR as the single- and double-substituted 2,5-DCBQ adducts with BHA, respectively (Fig. S2, Fig. S3, Table S1). The singlet line at  $\delta = 12.85$  in  $^1\text{H}$ -NMR and the line at  $\delta = 165.8$  in  $^{13}\text{C}$ -NMR were assigned to the N-H proton and C=O carbon of  $-\text{C}(\text{O})-\text{NH}-\text{O}-$  of  $P_1$ , respectively. Similarly, the singlet line at  $\delta = 12.85$  in  $^1\text{H}$ -NMR and the line at  $\delta = 165.5$  in  $^{13}\text{C}$ -NMR were assigned to the N-H proton and C=O carbon of  $-\text{C}(\text{O})-\text{NH}-\text{O}-$  of  $P_2$ , respectively. This assignment is in agreement with the previously reported NMR data for similar *O*-substituted benzohydroxamate compounds.<sup>3-6</sup>

**3. Direct detection and identification of phenyl isocyanate from  $P_1$  via pyrolysis by GC/MS.** Preliminary experiment showed that the solid form of  $P_1$  decomposed at its

melting point (146.3 °C), so pyrolysis of solid P<sub>1</sub> was performed for direct detection of phenyl isocyanate in GC/MS. Gas chromatography-mass spectrometry (GC/MS) was performed with a nonpolar capillary column (0.25 mm×30 m). 2 µl n-hexane containing P<sub>1</sub> (2 mg/ml) was injected to GC/MS. The injector was set at 250 °C, and the oven temperature was programmed at 50 °C for 2 min, ramped at 5 °C/min to 280 °C, and maintained at this temperature for 10 min. The carrier gas was helium with a constant flow rate of 1.0 ml/min. The mass spectrometer was operated in the electron impact ionization mode at 70 eV with an interface temperature of 280 °C and a source temperature of 230 °C. Positive fragment ions were analyzed over mass range (50-500 *m/z*) in the scan mode. Reagent-grade phenyl isocyanate was used as standard reference to identification of the pyrolysis product of P<sub>1</sub>.

**4. Analysis of the reaction products of other C<sub>n</sub>BQ/BHA by HPLC/MS.** The reactions of 2-chloro (2-CBQ), 2,6-dichloro (2,6-DCBQ), 2,3-dichloro (2,3-DCBQ), 2,3,5-trichloro (TrCBQ) -1,4-benzoquinone with BHA were performed as that of 2,5-DCBQ/BHA: 1 mM C<sub>n</sub>BQ was mixed with 1 mM BHA in 1 ml Chelex-treated CH<sub>3</sub>COONH<sub>4</sub> buffer (100 mM, pH 7.0) at room temperature for 1 min and then was injected into HPLC/MS.

For detection of the products of 2-CBQ, 2,6-DCBQ, 2,3-DCBQ with BHA, the experimental conditions of HPLC/MS were as that of 2,5-DCBQ/BHA described in methods. The HPLC/MS profiles are shown in Fig. S4. The main product of 2,6-DCBQ/BHA was eluted at 5.91 min and showed the molecular ion peak [M-H]<sup>-</sup> at *m/z* 276, and the fragment ion at *m/z* 157, both of which were one chlorine isotope peak

clusters, suggesting it was the 1:1 adduct of 2,6-DCBQ with BHA, just as similar as P<sub>1</sub> in 2,5-DBQQ/BHA. The main product of 2,3-DCBQ/BHA was 2-chloro-3-hydroxy-1,4-benzoquinone, not the 1:1 2,3-DCBQ/BHA adduct, which was isolated with the elute time of 2.41 min and showed the molecular ion peak [M-H]<sup>-</sup> at *m/z* 157. The main product peak of 2-CBQ/BHA was appeared at 4.91 min, and showed that the molecular ion peak [M-H]<sup>-</sup> at *m/z* 242, and the fragment ion at *m/z* 123, suggesting it is the 1:1 2-CBQ/BHA adduct.

For detection of the products of TrCBQ with BHA, the HPLC mobile phase were adjusted to a gradient elution by varying the proportion of 50 mM acetic acid (solvent A) to acetonitrile (solvent B) at a rate of 1.0 ml/min: the mobile phase composition started at 15% B in 5 min, then followed by a linear increase of B to 50% within 1 min, then 50% B for 12 min, and then followed by a linear decrease of B to 15% within 1 min, then 15% B for 8 min. All other analytic parameters was the same as that of 2,5-DCBQ/BHA. Besides by MS analysis, the reaction products of TrCBQ/BHA (1:1) were shown in Fig. S5 and determined by comparison with the typical products of C<sub>n</sub>BQs/H<sub>2</sub>O<sub>2</sub>; the reaction conditions of C<sub>n</sub>BQs/H<sub>2</sub>O<sub>2</sub> were the same as described in our previous study,<sup>7</sup> in which we found that hydroxyl radicals were rapidly generated in a metal-independent way from C<sub>n</sub>BQ/H<sub>2</sub>O<sub>2</sub>. For 2,5-DCBQ, 2,6-DCBQ, or 2,3-DCBQ)/H<sub>2</sub>O<sub>2</sub>, we also found that hydroxyl radicals generated were able to directly attack at the quinoid rings, resulting in formation of by-products 2,5-dichloro-3-hydroxy-1,4-benzoquinone (**6**) (eluted at 3.3 min, Fig. S5 A), 2,6-dichloro-3-hydroxy-1,4-benzoquinone (**7**) (eluted at 3.3 min, Fig. S5-A),

2,3-dichloro-5-hydroxy-1,4-benzoquinone (**5**) (eluted at 9.3 min, Fig. S5 A), respectively. All of the byproducts are two chlorine isotope peak clusters and showed the molecular ion peak  $[M-H]^-$  at  $m/z$  191.

In Fig. S5 A, two product peaks appeared from the reaction solution of TrCBQ/BHA (1:1): the one eluted at 3.2 min with molecular ion peak  $[M-H]^-$  at  $m/z$  191 might be **6** or **7**, the other, which was eluted at 15.26 min and showed that the molecular ion peak  $[M-H]^-$  at  $m/z$  310 and the fragment ion peak at  $m/z$  191, both of which are two chlorine isotope peak clusters (Fig. S5 B), might be the relatively stable 1:1 TrCBQ/BHA adduct formed when 5-chloro of TrCBQ was substituted by BHA. It was further supported by the fact that its thermal decomposition led to formation of **5**, which was eluted at 9.3 min (Fig. S5-A) with the molecular ion peak  $[M-H]^-$  at  $m/z$  191 (Fig. S5 C).

**5. Experimental measurement of  $pK_a$  values of  $P_1$  and hydroxylated chloroquinoid products in solution.** The  $pK_a$  value of  $P_1$  was measured by the titration method with a pH meter.<sup>8</sup> The  $pK_a$  values of some easily prepared hydroxylated chlorobenzoquinones were also obtained by experimental measurement: 2-chloro-3-hydroxy-1,4-benzoquinone (**2**) was directly collected by semi-preparative HPLC from the reaction solution of 2,3-DCBQ/BHA (1:1). 2-chloro-5-hydroxy-1,4-benzoquinone (**3**) was collected by semi-preparative HPLC from the thermal decomposition of  $P_1$  in buffer solution (pH 7.0, 50 °C). Their  $pK_a$  values were measured with a UV-visible spectrophotometer.

6. SI Figures and Tables

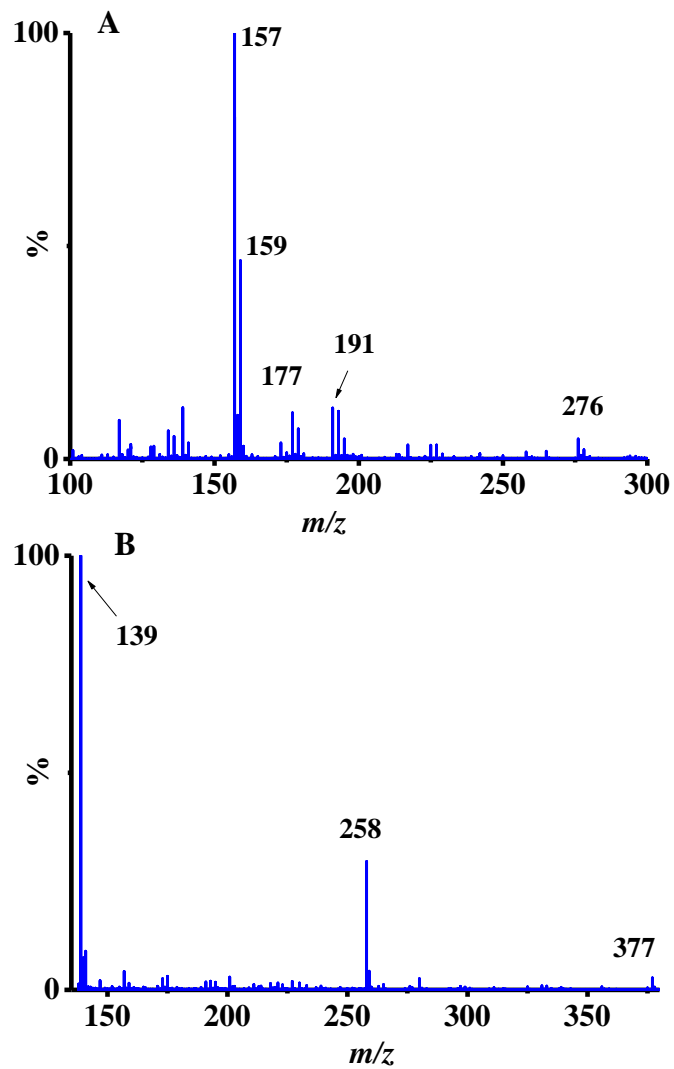

**Fig. S1:** Mass spectra of the reaction solutions of 2,5-DCBQ/BHA (A 1:1, B 1:2) in  $\text{CH}_3\text{COONH}_4$  buffer (pH 7.0, 0.1 M) at room temperature.

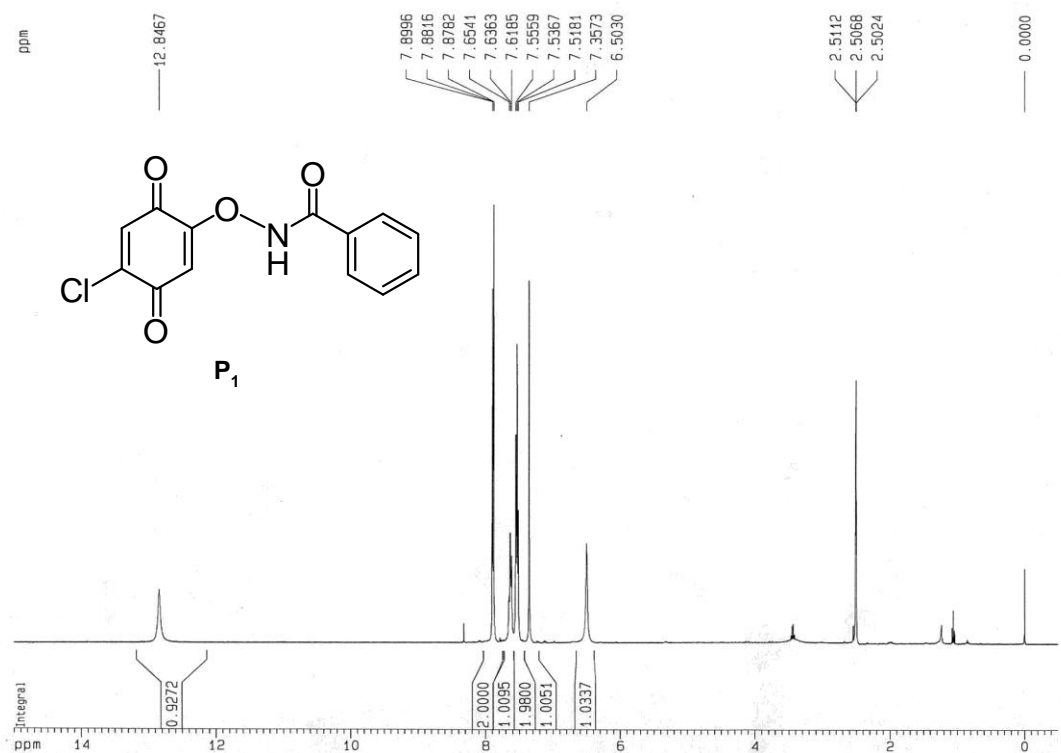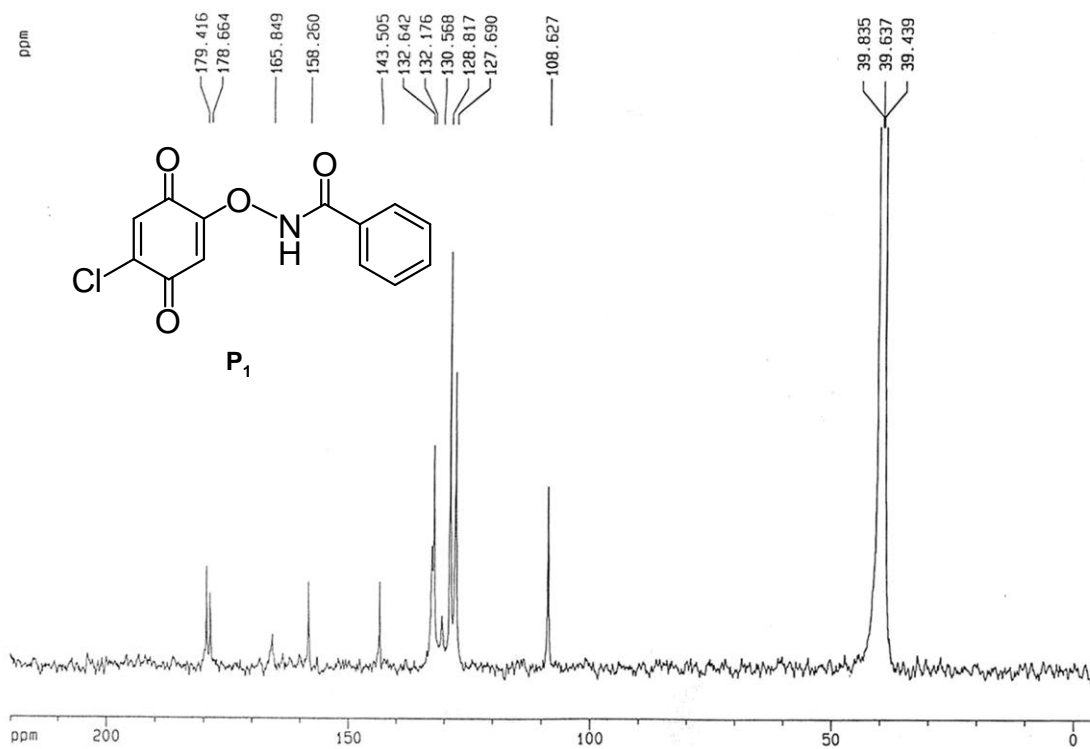

**Fig. S2:** The <sup>1</sup>H-NMR and <sup>13</sup>C-NMR of P<sub>1</sub> in DMSO-*d*<sub>6</sub>.



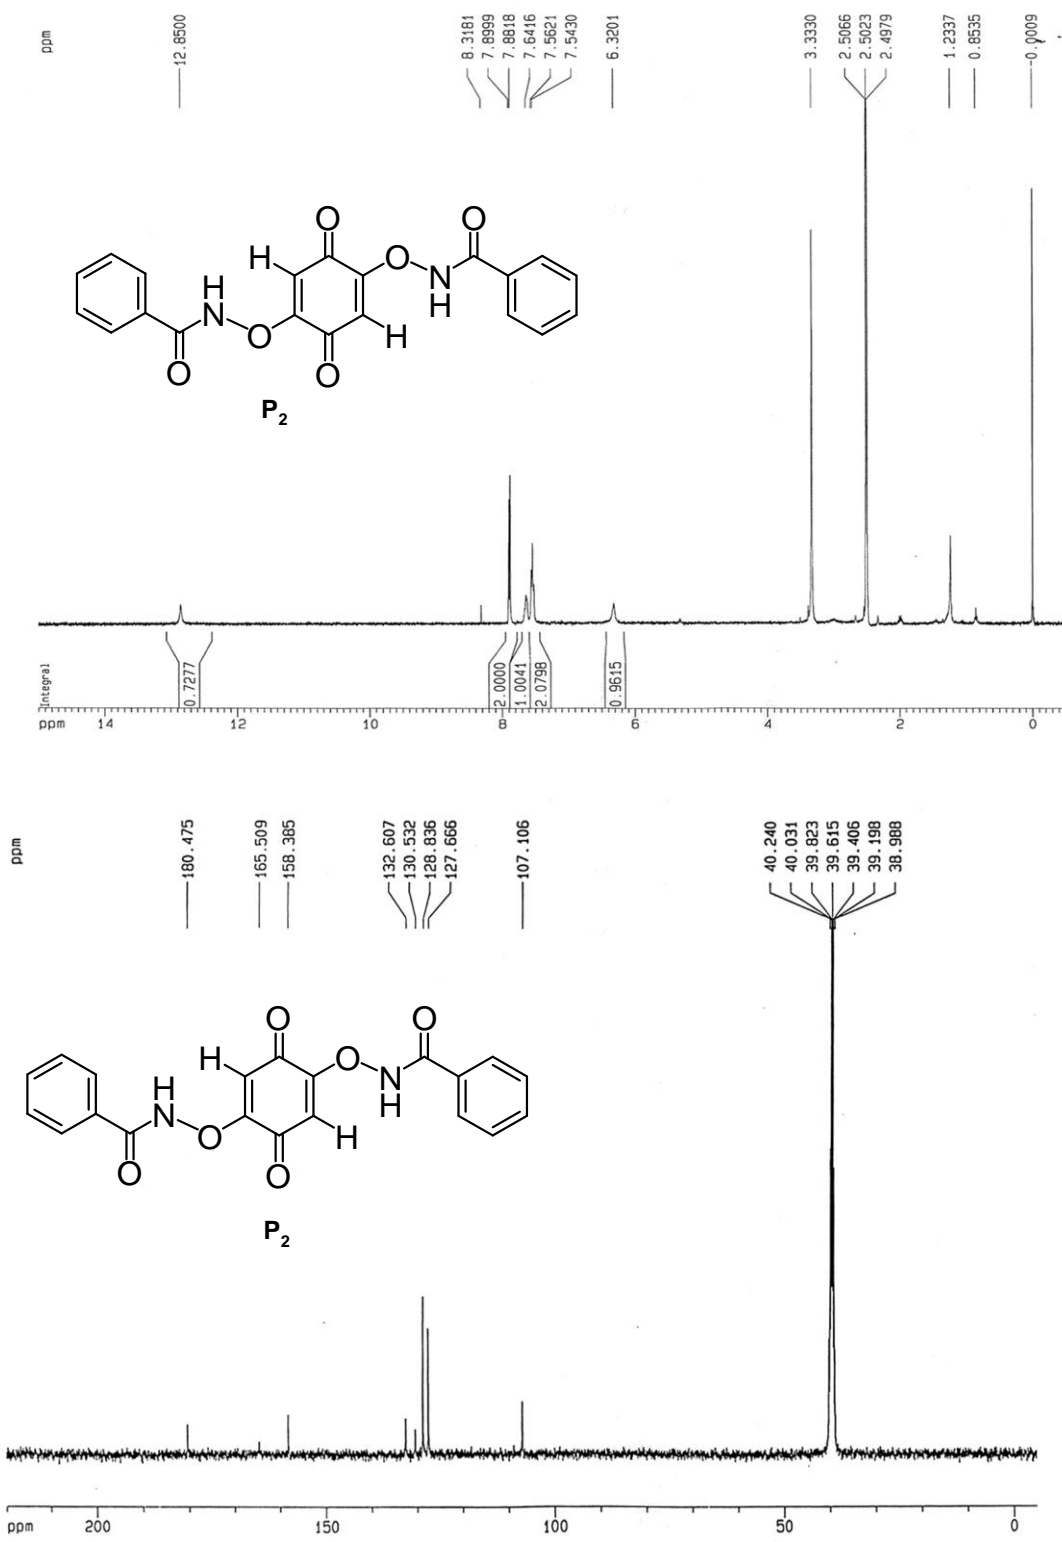

**Fig. S3:** The <sup>1</sup>H-NMR and <sup>13</sup>C-NMR of P<sub>2</sub> in DMSO-*d*<sub>6</sub>.

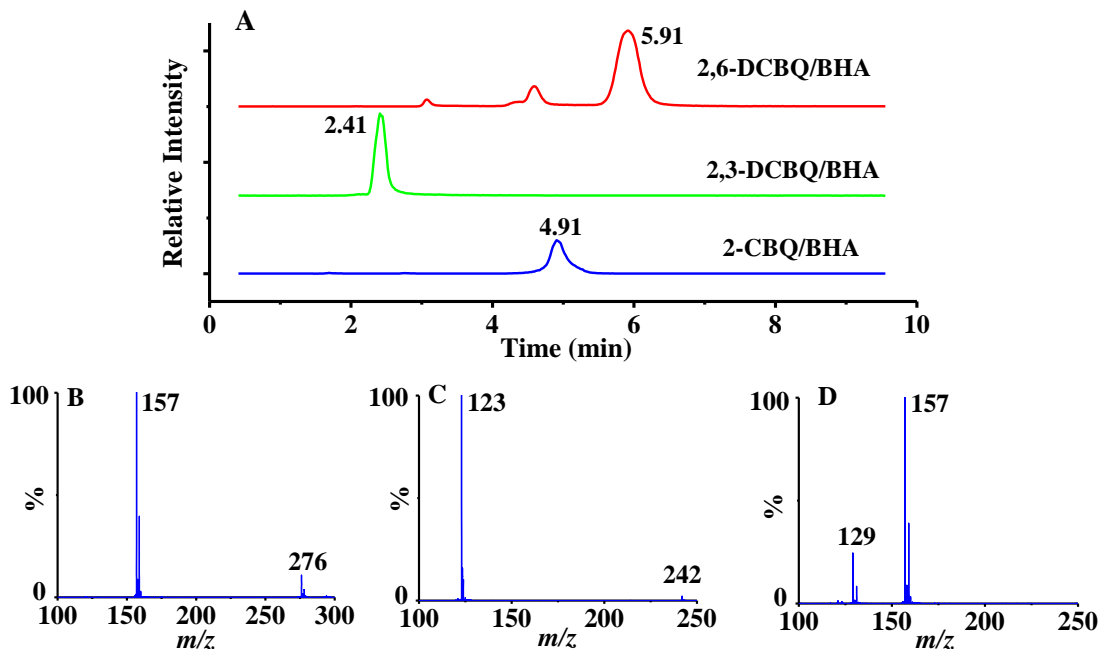

**Fig. S4:** (A) The HPLC/MS selected ion monitoring (SIM) profile of the reaction mixtures of BHA with 2,6-DCBQ (monitoring at  $m/z$  157, the fragment ion peak, corresponding to the anion of 2-chloro-6-hydroxy-1,4-benzoquinone (**4**)), and 2,3-DCBQ (monitoring at  $m/z$  157, the fragment ion peak, corresponding to the anion of 2-chloro-3-hydroxy-1,4-benzoquinone (**2**)). 2-CBQ (monitoring at  $m/z$  123, the fragment ion peak, corresponding to the anion of 2-hydroxy-1,4-benzoquinone(**1**)). Other experimental conditions were just the same as the reaction of 2,5-DCBQ/BHA. (B) The MS spectrum of the product peak at the retention time of 5.91 min in the HPLC/MS chromatogram of 2,6-DCBQ/BHA, showing the main product of 2,6-DCBQ/BHA was the 1:1 adduct of 2,6-DCBQ with BHA; (C) The MS spectrum of the product peak at the retention time of 4.91 min in the HPLC/MS chromatogram of 2-CBQ/BHA, showing the main product of 2-CBQ/BHA was the 1:1 adduct of 2-CBQ with BHA; (D) The MS spectrum of the product peak at the retention time of 2.41 min in the HPLC/MS chromatogram of 2,3-DCBQ/BHA, showing the main product of 2,3-DCBQ/BHA was 2-chloro-3-hydroxy-1,4-benzoquinone.

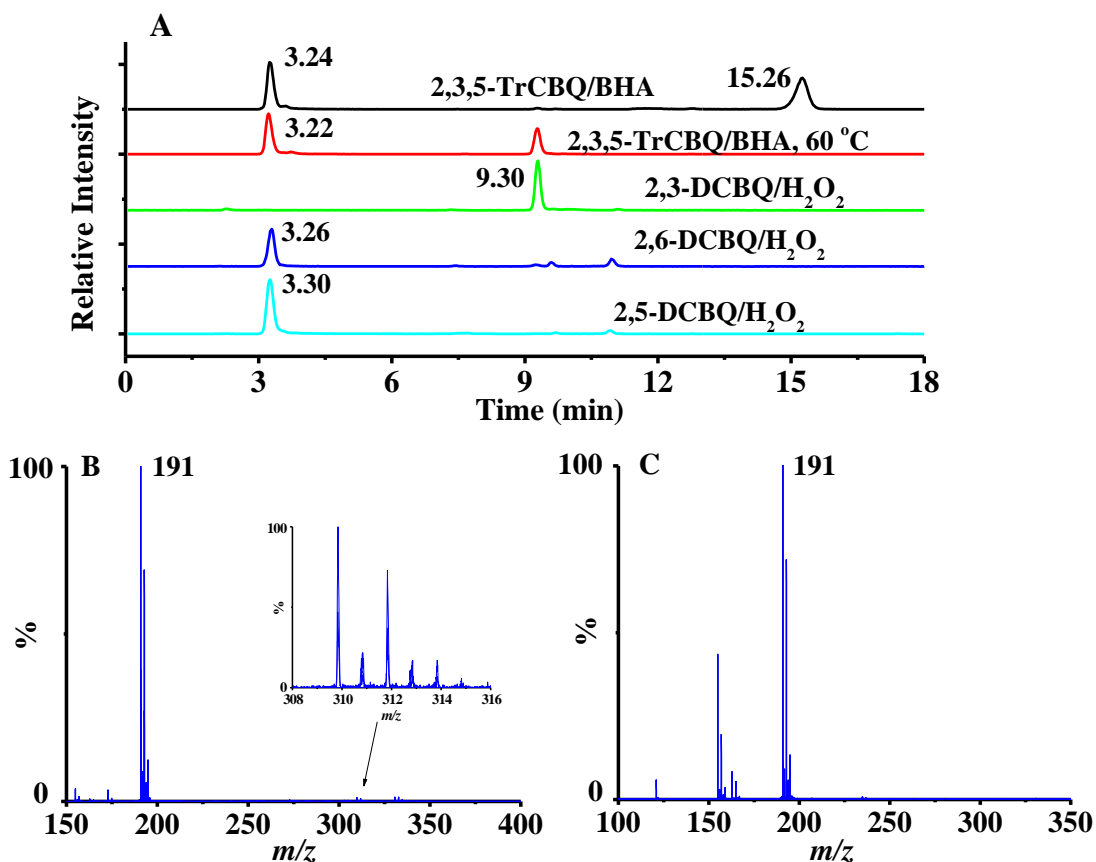

**Fig. S5:** (A) The HPLC/MS selected ion monitoring (SIM) profile of the 1:1 reaction mixtures of 2,3,5-TrCBQ/BHA (1:1), 2,3,5-TrCBQ/BHA (1:1, 60 °C), 2,3-DCBQ/H<sub>2</sub>O<sub>2</sub> (1:10), 2,6-DCBQ/H<sub>2</sub>O<sub>2</sub> (1:10), 2,5-DCBQ/H<sub>2</sub>O<sub>2</sub> (1:10), which were all monitored at *m/z* 191, corresponding to dichloro-hydroxyl-1,4-benzoquinone. The reactions were performed at room temperature, except for the thermal reaction of 2,3,5-TrCBQ/BHA (1:1, 60 °C). (B) The MS spectrum of the product peak at the retention time of 15.26 min in the HPLC/MS chromatogram of 2,3,5-TrCBQ/BHA; (C) The MS spectrum of the product peak at the retention time of 9.30 min in the HPLC/MS chromatogram of 2,3,5-TrCBQ/BHA (1:1, 60 °C) or 2,3-DCBQ/BHA.

**Table S1:** NMR (DMSO-*d*<sub>6</sub>) assignments for **P**<sub>1</sub> (A) and **P**<sub>2</sub> (B)

| A                                |                                                                                   |                           |          | B                                |                                                                                    |                           |              |
|----------------------------------|-----------------------------------------------------------------------------------|---------------------------|----------|----------------------------------|------------------------------------------------------------------------------------|---------------------------|--------------|
| Formula of <b>P</b> <sub>1</sub> |                                                                                   |                           |          | Formula of <b>P</b> <sub>2</sub> |                                                                                    |                           |              |
|                                  | 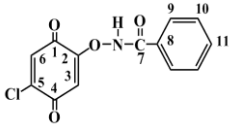 |                           |          |                                  |  |                           |              |
| $\delta_{\text{H}}$ (ppm)        | position                                                                          | $\delta_{\text{C}}$ (ppm) | position | $\delta_{\text{H}}$ (ppm)        | position                                                                           | $\delta_{\text{C}}$ (ppm) | position     |
| 12.85 (s, 1H)                    | N-H                                                                               | 179.4, 178.7              | C-1,4    | 12.85 (s, 2H)                    | N-H                                                                                | C-1                       | 180.5        |
| 7.88 (m, 2H)                     | C-10                                                                              | 165.8                     | C-7      | 7.89 (m, 4H)                     | C-7                                                                                | C-4                       | 165.5        |
| 7.64 (m, 1H)                     | C-11                                                                              | 158.3, 143.5              | C-2,5    | 7.64 (m, 2H)                     | C-8                                                                                | C-2                       | 158.4        |
| 7.54 (m, 2H)                     | C-9                                                                               | 132.6                     | C-11     | 7.55 (m, 4H)                     | C-6                                                                                | C-5                       | 132.6        |
| 7.36 (s, 1H)                     | C-6                                                                               | 130.6                     | C-8      | 6.32 (s, 2H)                     | C-3                                                                                | C-8                       | 130.5        |
| 6.50 (s, 1H)                     | C-3                                                                               | 128.8, 127.7              | C-9,10   |                                  |                                                                                    | C-6,7                     | 128.8, 127.7 |

**Table S2:** Calculated and measured  $pK_{\text{a}}$  values of a series of hydroxylated benzoquinones

| No. | Hydroxylated benzoquinones  | Formula                                                                             | $pK_{\text{a}}$                                                                                                          |              |
|-----|-----------------------------|-------------------------------------------------------------------------------------|--------------------------------------------------------------------------------------------------------------------------|--------------|
|     |                             |                                                                                     | expt.                                                                                                                    | calc.        |
| 1   | 2-hydroxy-                  |   | 4.0-4.2 <sup>a</sup>                                                                                                     | 4.23         |
| 2   | 2-chloro-3-hydroxy-         |  | 2.28 <sup>b</sup>                                                                                                        | 2.56         |
| 3   | 2-chloro-5-hydroxy-         |  | 3.63 <sup>b</sup>                                                                                                        | 3.56         |
| 4   | 2-chloro-6-hydroxy-         |  | -                                                                                                                        | 3.65         |
| 5   | 2,3-dichloro-5-hydroxy-     |  | -                                                                                                                        | 2.89         |
| 6   | 2,5-dichloro-3-hydroxy-     |  | -                                                                                                                        | 1.88         |
| 7   | 2,6-dichloro-3-hydroxy-     |  | 1.57 <sup>c</sup>                                                                                                        | 1.68         |
| 8   | 2,3,5-trichloro-6-hydroxy-  |  | 1.09 <sup>d</sup>                                                                                                        | 1.04         |
| 9   | 2,5-dichloro-3,6-dihydroxy- |  | 0.58 <sup>e</sup> , 0.76 <sup>f</sup> ( $pK_{\text{a}1}$ )<br>2.58 <sup>f</sup> , 3.18 <sup>e</sup> ( $pK_{\text{a}2}$ ) | 0.82<br>2.33 |

<sup>a</sup> ref. 9-11 <sup>b</sup> measured in this work. <sup>c</sup> ref. 12. <sup>d</sup> ref. 13. <sup>e</sup> ref. 14. <sup>f</sup> ref. 15

**Table S3:** The activation energies of the reactions of C<sub>n</sub>BQ/BHA (1:1)

| $\Delta G$ (kcal/mol)    | TCBQ  | TrCBQ-2 | TrCBQ-3 | TrCBQ-5 | 2,3-DCBQ | 2,5-DCBQ | 2,6-DCBQ | CBQ   |
|--------------------------|-------|---------|---------|---------|----------|----------|----------|-------|
| <b>S<sub>N</sub>2(1)</b> | 5.79  | 7.12    | 7.68    | 8.59    | 9.64     | 10.14    | 10.62    | 12.66 |
| <b>LR(1)</b>             | 16.97 | 17.90   | 18.01   | 22.89   | 17.64    | 23.90    | 23.93    | 24.43 |

## SI References

- (1) Pramanik, B. N.; Ganguly, A. K.; Gross, M. L. *Applied electrospray mass spectrometry*; Marcel Dekker: New York, 2002.
- (2) Zhu, B. Z.; Zhu, J. G.; Mao, L.; Kalyanaraman, B.; Shan, G. Q. *Proc. Natl. Acad. Sci. U.S.A.* **2010**, *107*, 20686.
- (3) Schraml, J.; Sykora, J.; Fiedler, P.; Roithova, J.; Mindl, J.; Blechta, V.; Cisarova, I.; Exner, O. *Org. Biomol. Chem.* **2004**, *2*, 2311.
- (4) Schraml, J.; Tkadlecova, M.; Pataridis, S.; Soukupova, L.; Blechta, V.; Roithova, J.; Exner, O. *Magn. Reson. Chem.* **2005**, *43*, 535.
- (5) Schraml, J.; Blechta, V.; Soukupova, L.; Karban, J.; Mindl, J. *Magn. Reson. Chem.* **2003**, *41*, 626.
- (6) Brown, D. A.; Glass, W. K.; Mageswaran, R.; Mohammed, S. A. *Magn. Reson. Chem.* **1991**, *29*, 40.
- (7) Zhu, B. Z.; Shan, G. Q.; Huang, C. H.; Kalyanaraman, B.; Mao, L.; Du, Y. G. *Proc. Natl. Acad. Sci. U. S. A.* **2009**, *106*, 11466.
- (8) Swidler, R.; Steinberg, G. M. *J. Am. Chem. Soc.* **1956**, *78*, 594.
- (9) Von Sonntag, J.; Mvula, E.; Hildenbrand, K.; Von Sonntag, C. *Chemistry* **2004**, *10*, 440.
- (10) Bailey, S. I.; Ritchie, I. M. *Electrochim. Acta* **1985**, *30*, 3.
- (11) Schuchmann, M. N.; Bothe, E.; von Sonntag, J.; von Sonntag, C. *J. Chem. Soc., Perkin Trans. 2* **1998**, 791.
- (12) Lente, G.; Espenson, J. H. *New J. Chem.* **2004**, *28*, 847.
- (13) Osman, A. M.; Posthumus, M. A.; Veeger, C.; van Bladeren, P. J.; Laane, C.; Rietjens, I. M. C. M. *Chem. Res. Toxicol.* **1998**, *11*, 1319.
- (14) Kabir, M. K.; Tobita, H.; Matsuo, H.; Nagayoshi, K.; Yamada, K.; Adachi, K.; Sugiyama, Y.; Kitagawa, S.; Kawata, S. *Cryst. Growth Des.* **2003**, *3*, 791.
- (15) Mostafa, S. I. *Transition Met. Chem. (Dordrecht, Neth.)* **1999**, *24*, 306.

## Cartesian coordinate of some key structures and IRC calculations for TS in Fig. 4

### TCBQ in Fig. 4A

| Center Number | Atomic Number | Atomic Type | Coordinates (Angstroms) |           |           |
|---------------|---------------|-------------|-------------------------|-----------|-----------|
|               |               |             | X                       | Y         | Z         |
| 1             | 6             | 0           | -1.281337               | -0.676229 | 0.000337  |
| 2             | 6             | 0           | -1.281337               | 0.676229  | 0.000256  |
| 3             | 6             | 0           | 0.000000                | 1.457326  | 0.000616  |
| 4             | 6             | 0           | 1.281337                | 0.676229  | 0.000255  |
| 5             | 6             | 0           | 1.281337                | -0.676229 | 0.000338  |
| 6             | 6             | 0           | 0.000000                | -1.457326 | 0.001044  |
| 7             | 8             | 0           | 0.000000                | -2.671841 | -0.000243 |
| 8             | 8             | 0           | 0.000000                | 2.671841  | 0.000263  |
| 9             | 17            | 0           | 2.721754                | -1.616912 | -0.000194 |
| 10            | 17            | 0           | 2.721753                | 1.616913  | -0.000313 |
| 11            | 17            | 0           | -2.721753               | -1.616913 | -0.000197 |
| 12            | 17            | 0           | -2.721754               | 1.616912  | -0.000310 |

|                                              |                             |
|----------------------------------------------|-----------------------------|
| Zero-point correction=                       | 0.046899 (Hartree/Particle) |
| Thermal correction to Energy=                | 0.057936                    |
| Thermal correction to Enthalpy=              | 0.058880                    |
| Thermal correction to Gibbs Free Energy=     | 0.007774                    |
| Sum of electronic and zero-point Energies=   | -2219.781947                |
| Sum of electronic and thermal Energies=      | -2219.770909                |
| Sum of electronic and thermal Enthalpies=    | -2219.769965                |
| Sum of electronic and thermal Free Energies= | -2219.821071                |

### BHA<sup>+</sup> in Fig. 4A

| Center Number | Atomic Number | Atomic Type | Coordinates (Angstroms) |           |           |
|---------------|---------------|-------------|-------------------------|-----------|-----------|
|               |               |             | X                       | Y         | Z         |
| 1             | 8             | 0           | -3.458195               | -0.672466 | -0.203230 |
| 2             | 7             | 0           | -2.134251               | -0.646292 | -0.174756 |
| 3             | 6             | 0           | -1.337235               | 0.407802  | 0.101579  |
| 4             | 8             | 0           | -1.730324               | 1.573333  | 0.354096  |

|    |   |   |           |           |           |
|----|---|---|-----------|-----------|-----------|
| 5  | 6 | 0 | 0.136155  | 0.099581  | 0.045049  |
| 6  | 6 | 0 | 1.009220  | 1.192054  | -0.138835 |
| 7  | 6 | 0 | 2.390955  | 1.015770  | -0.203584 |
| 8  | 6 | 0 | 2.954097  | -0.260023 | -0.072073 |
| 9  | 6 | 0 | 2.104600  | -1.353403 | 0.139670  |
| 10 | 6 | 0 | 0.721052  | -1.175638 | 0.206605  |
| 11 | 1 | 0 | -1.669656 | -1.507628 | -0.456657 |
| 12 | 1 | 0 | 0.556752  | 2.175278  | -0.219670 |
| 13 | 1 | 0 | 3.036249  | 1.879429  | -0.353943 |
| 14 | 1 | 0 | 4.031860  | -0.398139 | -0.115414 |
| 15 | 1 | 0 | 2.522935  | -2.349344 | 0.272303  |
| 16 | 1 | 0 | 0.096706  | -2.039347 | 0.419283  |

---

Zero-point correction= 0.117663 (Hartree/Particle)  
 Thermal correction to Energy= 0.125929  
 Thermal correction to Enthalpy= 0.126874  
 Thermal correction to Gibbs Free Energy= 0.083960  
 Sum of electronic and zero-point Energies= -475.458681  
 Sum of electronic and thermal Energies= -475.450414  
 Sum of electronic and thermal Enthalpies= -475.449470  
 Sum of electronic and thermal Free Energies= -475.492383

**TS<sub>1</sub> in Fig. 4A**

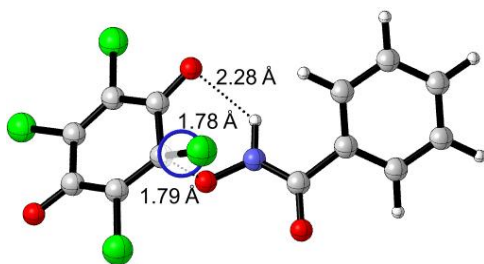


---

| Center Number | Atomic Number | Atomic Type | Coordinates (Angstroms) |           |           |
|---------------|---------------|-------------|-------------------------|-----------|-----------|
|               |               |             | X                       | Y         | Z         |
| 1             | 6             | 0           | 2.181338                | -1.425628 | 0.126182  |
| 2             | 6             | 0           | 3.217221                | -0.640215 | -0.243043 |
| 3             | 6             | 0           | 3.185643                | 0.884122  | -0.181584 |
| 4             | 6             | 0           | 1.968423                | 1.448701  | 0.280404  |
| 5             | 6             | 0           | 0.812675                | 0.682755  | 0.546919  |
| 6             | 6             | 0           | 0.941579                | -0.825279 | 0.664299  |

---

|    |    |   |           |           |           |
|----|----|---|-----------|-----------|-----------|
| 7  | 8  | 0 | 0.035161  | -1.513831 | 1.118725  |
| 8  | 8  | 0 | 4.208105  | 1.504127  | -0.513928 |
| 9  | 8  | 0 | -0.103266 | 0.527184  | -0.986480 |
| 10 | 7  | 0 | -1.353696 | 0.027344  | -0.857117 |
| 11 | 6  | 0 | -2.483482 | 0.800648  | -0.864236 |
| 12 | 8  | 0 | -2.527141 | 1.976865  | -1.214411 |
| 13 | 6  | 0 | -3.732056 | 0.042257  | -0.475562 |
| 14 | 6  | 0 | -4.939973 | 0.418858  | -1.080747 |
| 15 | 6  | 0 | -6.130868 | -0.224765 | -0.745245 |
| 16 | 6  | 0 | -6.132286 | -1.243056 | 0.215165  |
| 17 | 6  | 0 | -4.936380 | -1.607564 | 0.838975  |
| 18 | 6  | 0 | -3.739754 | -0.970311 | 0.497039  |
| 19 | 1  | 0 | -1.399103 | -0.943728 | -0.563717 |
| 20 | 1  | 0 | -4.921755 | 1.226138  | -1.806013 |
| 21 | 1  | 0 | -7.059469 | 0.069811  | -1.227454 |
| 22 | 1  | 0 | -7.060883 | -1.741242 | 0.481717  |
| 23 | 1  | 0 | -4.932314 | -2.382570 | 1.600729  |
| 24 | 1  | 0 | -2.822852 | -1.239262 | 1.014123  |
| 25 | 17 | 0 | -0.372897 | 1.336805  | 1.698747  |
| 26 | 17 | 0 | 4.701199  | -1.319082 | -0.822314 |
| 27 | 17 | 0 | 1.882664  | 3.201994  | 0.314429  |
| 28 | 17 | 0 | 2.230028  | -3.171391 | 0.091361  |

---

|                                              |                             |
|----------------------------------------------|-----------------------------|
| Zero-point correction=                       | 0.165977 (Hartree/Particle) |
| Thermal correction to Energy=                | 0.186098                    |
| Thermal correction to Enthalpy=              | 0.187042                    |
| Thermal correction to Gibbs Free Energy=     | 0.114212                    |
| Sum of electronic and zero-point Energies=   | -2695.285316                |
| Sum of electronic and thermal Energies=      | -2695.265195                |
| Sum of electronic and thermal Enthalpies=    | -2695.264251                |
| Sum of electronic and thermal Free Energies= | -2695.337081                |

**The IRC computational result of TS<sub>1</sub> in Fig. 4A:**



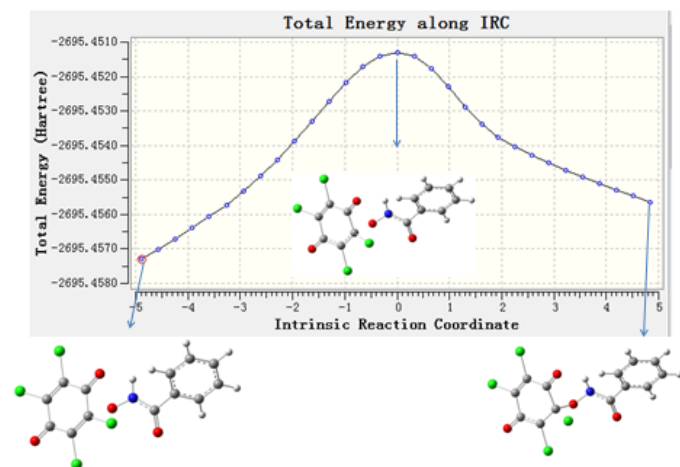

IN<sub>1</sub> in Fig. 4A

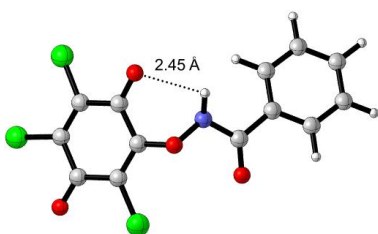

| Center Number | Atomic Number | Atomic Type | Coordinates (Angstroms) |           |           |
|---------------|---------------|-------------|-------------------------|-----------|-----------|
|               |               |             | X                       | Y         | Z         |
| 1             | 6             | 0           | 2.481248                | -1.269642 | 0.162686  |
| 2             | 6             | 0           | 3.338962                | -0.328319 | -0.292536 |
| 3             | 6             | 0           | 2.979048                | 1.135478  | -0.277548 |
| 4             | 6             | 0           | 1.610727                | 1.499453  | 0.200739  |
| 5             | 6             | 0           | 0.742918                | 0.549565  | 0.619982  |
| 6             | 6             | 0           | 1.152285                | -0.883216 | 0.731429  |
| 7             | 8             | 0           | 0.433465                | -1.695299 | 1.290638  |
| 8             | 8             | 0           | 3.767459                | 1.975962  | -0.661850 |
| 9             | 8             | 0           | -0.466064               | 0.905050  | 1.133988  |
| 10            | 17            | 0           | 1.204378                | 3.167660  | 0.182577  |
| 11            | 17            | 0           | 2.842590                | -2.953691 | 0.179232  |
| 12            | 7             | 0           | -1.531184               | 0.109838  | 0.639248  |
| 13            | 6             | 0           | -2.577365               | 0.858619  | 0.082865  |
| 14            | 8             | 0           | -2.462595               | 2.031812  | -0.218845 |
| 15            | 6             | 0           | -3.823082               | 0.056433  | -0.152535 |

|    |    |   |           |           |           |
|----|----|---|-----------|-----------|-----------|
| 16 | 6  | 0 | -5.025958 | 0.766489  | -0.282801 |
| 17 | 6  | 0 | -6.221543 | 0.083796  | -0.501108 |
| 18 | 6  | 0 | -6.224602 | -1.311336 | -0.601515 |
| 19 | 6  | 0 | -5.026912 | -2.022371 | -0.487418 |
| 20 | 6  | 0 | -3.827657 | -1.343613 | -0.262690 |
| 21 | 1  | 0 | -1.755788 | -0.602229 | 1.327048  |
| 22 | 1  | 0 | -5.002236 | 1.848835  | -0.213155 |
| 23 | 1  | 0 | -7.150110 | 0.638738  | -0.595464 |
| 24 | 1  | 0 | -7.156163 | -1.841913 | -0.775389 |
| 25 | 1  | 0 | -5.023475 | -3.104045 | -0.582028 |
| 26 | 1  | 0 | -2.899762 | -1.904903 | -0.208460 |
| 27 | 17 | 0 | 4.897695  | -0.701708 | -0.915694 |

---

|                                              |                             |
|----------------------------------------------|-----------------------------|
| Zero-point correction=                       | 0.167633 (Hartree/Particle) |
| Thermal correction to Energy=                | 0.186375                    |
| Thermal correction to Enthalpy=              | 0.187319                    |
| Thermal correction to Gibbs Free Energy=     | 0.116433                    |
| Sum of electronic and zero-point Energies=   | -2235.002457                |
| Sum of electronic and thermal Energies=      | -2234.983715                |
| Sum of electronic and thermal Enthalpies=    | -2234.982771                |
| Sum of electronic and thermal Free Energies= | -2235.053657                |

**IN<sub>2</sub> in Fig. 4A**

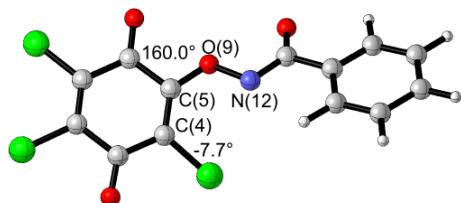


---

| Center Number | Atomic Number | Atomic Type | Coordinates (Angstroms) |           |           |
|---------------|---------------|-------------|-------------------------|-----------|-----------|
|               |               |             | X                       | Y         | Z         |
| 1             | 6             | 0           | 3.232362                | -0.828416 | 0.137016  |
| 2             | 6             | 0           | 3.455388                | 0.500700  | 0.105525  |
| 3             | 6             | 0           | 2.345188                | 1.499054  | -0.134345 |
| 4             | 6             | 0           | 0.996906                | 0.972817  | -0.276886 |
| 5             | 6             | 0           | 0.722164                | -0.380373 | -0.168286 |
| 6             | 6             | 0           | 1.847714                | -1.373892 | 0.015429  |
| 7             | 8             | 0           | 1.640438                | -2.572595 | 0.090952  |
| 8             | 8             | 0           | 2.633393                | 2.693440  | -0.222636 |

|    |    |   |           |           |           |
|----|----|---|-----------|-----------|-----------|
| 9  | 8  | 0 | -0.420045 | -1.028628 | -0.210177 |
| 10 | 17 | 0 | -0.188817 | 2.183441  | -0.702523 |
| 11 | 17 | 0 | 4.492070  | -2.005354 | 0.350843  |
| 12 | 7  | 0 | -1.612659 | -0.298788 | 0.056114  |
| 13 | 6  | 0 | -2.658354 | -1.069495 | -0.321566 |
| 14 | 8  | 0 | -2.656405 | -2.176308 | -0.892817 |
| 15 | 6  | 0 | -3.976172 | -0.399516 | 0.033298  |
| 16 | 6  | 0 | -5.158540 | -1.097591 | -0.248527 |
| 17 | 6  | 0 | -6.404667 | -0.542026 | 0.051639  |
| 18 | 6  | 0 | -6.486197 | 0.725500  | 0.637144  |
| 19 | 6  | 0 | -5.310302 | 1.430514  | 0.918505  |
| 20 | 6  | 0 | -4.064290 | 0.873940  | 0.620441  |
| 21 | 1  | 0 | -5.067504 | -2.077770 | -0.705905 |
| 22 | 1  | 0 | -7.312719 | -1.097399 | -0.172304 |
| 23 | 1  | 0 | -7.455070 | 1.160976  | 0.870389  |
| 24 | 1  | 0 | -5.363809 | 2.418253  | 1.370526  |
| 25 | 1  | 0 | -3.150889 | 1.417628  | 0.834478  |
| 26 | 17 | 0 | 5.038650  | 1.179281  | 0.297040  |

---

|                                              |                             |
|----------------------------------------------|-----------------------------|
| Zero-point correction=                       | 0.153498 (Hartree/Particle) |
| Thermal correction to Energy=                | 0.172101                    |
| Thermal correction to Enthalpy=              | 0.173046                    |
| Thermal correction to Gibbs Free Energy=     | 0.102453                    |
| Sum of electronic and zero-point Energies=   | -2234.496676                |
| Sum of electronic and thermal Energies=      | -2234.478072                |
| Sum of electronic and thermal Enthalpies=    | -2234.477128                |
| Sum of electronic and thermal Free Energies= | -2234.547721                |

**TS<sub>2</sub> in Fig. 4A**

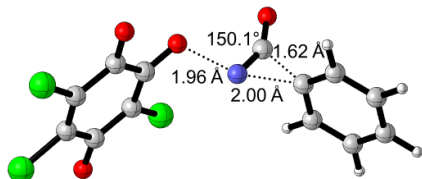


---

| Center Number | Atomic Number | Atomic Type | Coordinates (Angstroms) |           |          |
|---------------|---------------|-------------|-------------------------|-----------|----------|
|               |               |             | X                       | Y         | Z        |
| 1             | 7             | 0           | 1.880742                | -0.492009 | 0.381523 |
| 2             | 6             | 0           | 2.844711                | -0.463398 | 1.220802 |

|    |    |   |           |           |           |
|----|----|---|-----------|-----------|-----------|
| 3  | 8  | 0 | 3.248599  | -0.508083 | 2.375788  |
| 4  | 6  | 0 | 3.821062  | -0.286831 | -0.055483 |
| 5  | 8  | 0 | 0.248377  | -0.831479 | 1.418887  |
| 6  | 6  | 0 | -0.788399 | -0.347073 | 0.875778  |
| 7  | 6  | 0 | 4.212279  | 0.999826  | -0.445131 |
| 8  | 6  | 0 | 5.276391  | 1.159295  | -1.334931 |
| 9  | 6  | 0 | 5.937568  | 0.037318  | -1.847838 |
| 10 | 6  | 0 | 5.529462  | -1.247922 | -1.471578 |
| 11 | 6  | 0 | 4.465584  | -1.412427 | -0.582838 |
| 12 | 6  | 0 | -1.063183 | 0.995141  | 0.613388  |
| 13 | 6  | 0 | -2.262975 | 1.474200  | -0.023034 |
| 14 | 6  | 0 | -3.293020 | 0.420041  | -0.418553 |
| 15 | 6  | 0 | -3.117782 | -0.892131 | -0.171657 |
| 16 | 6  | 0 | -1.863803 | -1.380933 | 0.487784  |
| 17 | 17 | 0 | 0.082831  | 2.218693  | 1.111980  |
| 18 | 8  | 0 | -2.520232 | 2.657026  | -0.256158 |
| 19 | 17 | 0 | -4.292878 | -2.110240 | -0.584872 |
| 20 | 8  | 0 | -1.697723 | -2.565271 | 0.705858  |
| 21 | 1  | 0 | 3.680061  | 1.859632  | -0.050819 |
| 22 | 1  | 0 | 5.583215  | 2.157352  | -1.636963 |
| 23 | 1  | 0 | 6.761438  | 0.163436  | -2.545518 |
| 24 | 1  | 0 | 6.034250  | -2.120364 | -1.878705 |
| 25 | 1  | 0 | 4.130810  | -2.403337 | -0.291687 |
| 26 | 17 | 0 | -4.717865 | 1.035027  | -1.191945 |

---

|                                              |                             |
|----------------------------------------------|-----------------------------|
| Zero-point correction=                       | 0.149664 (Hartree/Particle) |
| Thermal correction to Energy=                | 0.169011                    |
| Thermal correction to Enthalpy=              | 0.169956                    |
| Thermal correction to Gibbs Free Energy=     | 0.096697                    |
| Sum of electronic and zero-point Energies=   | -2234.473611                |
| Sum of electronic and thermal Energies=      | -2234.454264                |
| Sum of electronic and thermal Enthalpies=    | -2234.453320                |
| Sum of electronic and thermal Free Energies= | -2234.526578                |

**The IRC computational result on TS<sub>2</sub> in Fig. 4A**

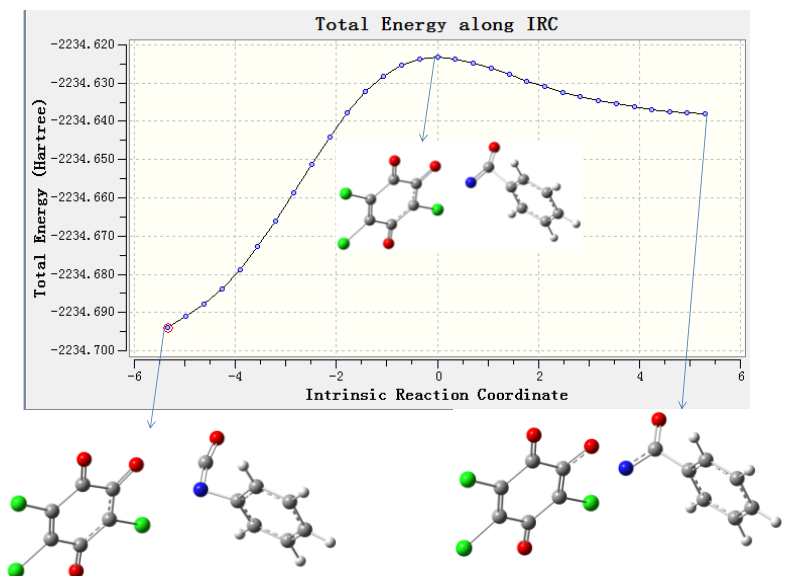

#### TrCBQO<sup>-</sup> in Fig. 4A

| Center Number | Atomic Number | Atomic Type | Coordinates (Angstroms) |           |           |
|---------------|---------------|-------------|-------------------------|-----------|-----------|
|               |               |             | X                       | Y         | Z         |
| 1             | 6             | 0           | 1.242279                | 0.487174  | 0.000004  |
| 2             | 6             | 0           | 0.806260                | -0.788531 | 0.000061  |
| 3             | 6             | 0           | -0.678831               | -1.175532 | 0.000198  |
| 4             | 6             | 0           | -1.597480               | -0.092850 | 0.000066  |
| 5             | 6             | 0           | -1.258273               | 1.282519  | -0.000002 |
| 6             | 6             | 0           | 0.265240                | 1.616885  | -0.000078 |
| 7             | 8             | 0           | 0.643967                | 2.773547  | 0.000026  |
| 8             | 8             | 0           | -0.957021               | -2.384791 | -0.000175 |
| 9             | 8             | 0           | -2.035530               | 2.247842  | -0.000017 |
| 10            | 17            | 0           | -3.309692               | -0.507266 | 0.000020  |
| 11            | 17            | 0           | 2.936309                | 0.926574  | -0.000045 |
| 12            | 17            | 0           | 1.909471                | -2.129353 | 0.000015  |

Zero-point correction= 0.047741 (Hartree/Particle)  
 Thermal correction to Energy= 0.058593  
 Thermal correction to Enthalpy= 0.059537  
 Thermal correction to Gibbs Free Energy= 0.009130  
 Sum of electronic and zero-point Energies= -1834.919519  
 Sum of electronic and thermal Energies= -1834.908667  
 Sum of electronic and thermal Enthalpies= -1834.907723

Sum of electronic and thermal Free Energies= -1834.958130

**TS<sub>3</sub> in Fig. 4A**

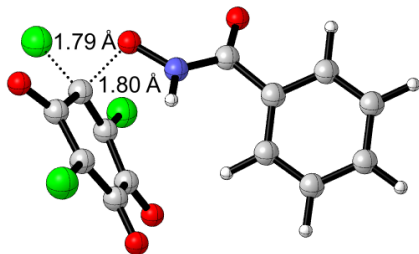

---

| Center Number | Atomic Number | Atomic Type | Coordinates (Angstroms) |           |           |
|---------------|---------------|-------------|-------------------------|-----------|-----------|
|               |               |             | X                       | Y         | Z         |
| 1             | 7             | 0           | 0.467762                | -0.606199 | -1.134591 |
| 2             | 6             | 0           | 1.591018                | -1.341977 | -0.965612 |
| 3             | 8             | 0           | 1.702659                | -2.553475 | -1.194419 |
| 4             | 6             | 0           | 2.796321                | -0.526321 | -0.538113 |
| 5             | 8             | 0           | -0.731492               | -1.126271 | -1.480234 |
| 6             | 6             | 0           | -1.945177               | -0.675055 | -0.228384 |
| 7             | 6             | 0           | 2.727092                | 0.559449  | 0.349781  |
| 8             | 6             | 0           | 3.891472                | 1.242747  | 0.716304  |
| 9             | 6             | 0           | 5.133792                | 0.852348  | 0.209554  |
| 10            | 6             | 0           | 5.210571                | -0.241905 | -0.661598 |
| 11            | 6             | 0           | 4.051224                | -0.928713 | -1.022935 |
| 12            | 6             | 0           | -1.440357               | -0.784902 | 1.085091  |
| 13            | 6             | 0           | -0.804135               | 0.292751  | 1.762105  |
| 14            | 6             | 0           | -0.809048               | 1.694336  | 1.050302  |
| 15            | 6             | 0           | -1.516320               | 1.787774  | -0.178805 |
| 16            | 6             | 0           | -2.267565               | 0.740481  | -0.781516 |
| 17            | 17            | 0           | -1.320801               | -2.384682 | 1.859546  |
| 18            | 8             | 0           | -0.240490               | 0.214400  | 2.868472  |
| 19            | 17            | 0           | -1.679035               | 3.410021  | -0.910274 |
| 20            | 8             | 0           | -3.071364               | 0.864019  | -1.717796 |
| 21            | 1             | 0           | 1.784580                | 0.866878  | 0.791672  |
| 22            | 1             | 0           | 3.814214                | 2.075292  | 1.410162  |
| 23            | 1             | 0           | 6.036346                | 1.387695  | 0.497965  |
| 24            | 1             | 0           | 6.174496                | -0.561005 | -1.054044 |
| 25            | 1             | 0           | 4.090543                | -1.794881 | -1.676632 |
| 26            | 1             | 0           | 0.484056                | 0.406646  | -1.036926 |

---

|    |    |   |           |           |           |
|----|----|---|-----------|-----------|-----------|
| 27 | 17 | 0 | -3.181768 | -1.869823 | -0.738050 |
| 28 | 8  | 0 | -0.194893 | 2.625441  | 1.604246  |

---

**IN<sub>3</sub> in Fig. 4A**

| Center<br>Number | Atomic<br>Number | Atomic<br>Type | Coordinates (Angstroms) |           |           |
|------------------|------------------|----------------|-------------------------|-----------|-----------|
|                  |                  |                | X                       | Y         | Z         |
| 1                | 7                | 0              | 1.214343                | -0.483740 | 0.157892  |
| 2                | 6                | 0              | 2.375974                | -1.133801 | -0.148449 |
| 3                | 8                | 0              | 2.457421                | -2.313582 | -0.481494 |
| 4                | 6                | 0              | 3.602851                | -0.265309 | 0.019311  |
| 5                | 8                | 0              | 0.050167                | -1.244777 | -0.118761 |
| 6                | 6                | 0              | -1.132698               | -0.587732 | -0.028551 |
| 7                | 6                | 0              | 3.581391                | 1.024165  | 0.574493  |
| 8                | 6                | 0              | 4.762783                | 1.760843  | 0.685693  |
| 9                | 6                | 0              | 5.975276                | 1.220382  | 0.247761  |
| 10               | 6                | 0              | 6.001920                | -0.065225 | -0.302075 |
| 11               | 6                | 0              | 4.823059                | -0.802923 | -0.413644 |
| 12               | 6                | 0              | -2.248393               | -1.360722 | 0.085918  |
| 13               | 6                | 0              | -3.589700               | -0.767606 | 0.124161  |
| 14               | 6                | 0              | -3.701068               | 0.791548  | 0.031199  |
| 15               | 6                | 0              | -2.474039               | 1.514309  | -0.104911 |
| 16               | 6                | 0              | -1.206173               | 0.927407  | -0.159772 |
| 17               | 17               | 0              | -2.127789               | -3.100746 | 0.192473  |
| 18               | 8                | 0              | -4.604505               | -1.436650 | 0.234299  |
| 19               | 17               | 0              | -2.565891               | 3.263684  | -0.237250 |
| 20               | 8                | 0              | -0.117791               | 1.567145  | -0.319319 |
| 21               | 1                | 0              | 2.652524                | 1.458271  | 0.929509  |
| 22               | 1                | 0              | 4.733316                | 2.757804  | 1.116421  |
| 23               | 1                | 0              | 6.892502                | 1.796791  | 0.335599  |
| 24               | 1                | 0              | 6.940862                | -0.492562 | -0.644066 |
| 25               | 1                | 0              | 4.819084                | -1.803890 | -0.832291 |
| 26               | 8                | 0              | -4.829188               | 1.283063  | 0.079164  |
| 27               | 1                | 0              | 0.977929                | 0.526215  | -0.067141 |

---

|                                 |                             |
|---------------------------------|-----------------------------|
| Zero-point correction=          | 0.167690 (Hartree/Particle) |
| Thermal correction to Energy=   | 0.186039                    |
| Thermal correction to Enthalpy= | 0.186984                    |

|                                              |              |
|----------------------------------------------|--------------|
| Thermal correction to Gibbs Free Energy=     | 0.117389     |
| Sum of electronic and zero-point Energies=   | -1850.151454 |
| Sum of electronic and thermal Energies=      | -1850.133105 |
| Sum of electronic and thermal Enthalpies=    | -1850.132161 |
| Sum of electronic and thermal Free Energies= | -1850.201756 |

**TS<sub>1a</sub> in Fig. 4A**

| Center<br>Number | Atomic<br>Number | Atomic<br>Type | Coordinates (Angstroms) |           |           |
|------------------|------------------|----------------|-------------------------|-----------|-----------|
|                  |                  |                | X                       | Y         | Z         |
| 1                | 6                | 0              | -2.287439               | 1.314076  | -0.523896 |
| 2                | 6                | 0              | -3.560349               | 1.244626  | -0.081170 |
| 3                | 6                | 0              | -4.239446               | -0.073432 | 0.164878  |
| 4                | 6                | 0              | -3.405646               | -1.277366 | 0.022185  |
| 5                | 6                | 0              | -2.099317               | -1.226067 | -0.362858 |
| 6                | 6                | 0              | -1.525053               | 0.070883  | -0.867687 |
| 7                | 8                | 0              | -0.596416               | 0.101043  | -1.665299 |
| 8                | 8                | 0              | -5.414414               | -0.115951 | 0.507064  |
| 9                | 8                | 0              | -1.391667               | -2.358152 | -0.455717 |
| 10               | 7                | 0              | -0.038692               | -2.225082 | 0.001366  |
| 11               | 6                | 0              | 0.788940                | -3.116930 | -0.585918 |
| 12               | 8                | 0              | 0.471281                | -3.933747 | -1.458484 |
| 13               | 6                | 0              | 2.206869                | -3.059521 | -0.052639 |
| 14               | 6                | 0              | 3.185903                | -3.745151 | -0.786317 |
| 15               | 6                | 0              | 4.515585                | -3.752812 | -0.363236 |
| 16               | 6                | 0              | 4.883411                | -3.077721 | 0.805557  |
| 17               | 6                | 0              | 3.911635                | -2.398142 | 1.545634  |
| 18               | 6                | 0              | 2.579665                | -2.388149 | 1.122736  |
| 19               | 1                | 0              | 0.104939                | -1.201281 | 0.612681  |
| 20               | 1                | 0              | 2.873102                | -4.270739 | -1.682635 |
| 21               | 1                | 0              | 5.264488                | -4.285833 | -0.943801 |
| 22               | 1                | 0              | 5.918554                | -3.081843 | 1.137675  |
| 23               | 1                | 0              | 4.186594                | -1.871713 | 2.455489  |
| 24               | 1                | 0              | 1.839483                | -1.858289 | 1.712684  |
| 25               | 17               | 0              | -4.524927               | 2.651125  | 0.226255  |
| 26               | 8                | 0              | 0.033906                | -0.028606 | 1.146819  |
| 27               | 7                | 0              | 1.058256                | 0.678559  | 0.584827  |
| 28               | 6                | 0              | 1.601503                | 1.758474  | 1.210840  |
| 29               | 8                | 0              | 1.326557                | 2.117368  | 2.358179  |



|    |    |   |           |           |           |
|----|----|---|-----------|-----------|-----------|
| 30 | 6  | 0 | 2.639217  | 2.487399  | 0.388081  |
| 31 | 6  | 0 | 2.854393  | 3.843052  | 0.677489  |
| 32 | 6  | 0 | 3.800801  | 4.580149  | -0.034733 |
| 33 | 6  | 0 | 4.557689  | 3.967885  | -1.039638 |
| 34 | 6  | 0 | 4.363279  | 2.612987  | -1.321368 |
| 35 | 6  | 0 | 3.411666  | 1.875367  | -0.611837 |
| 36 | 1  | 0 | 1.096291  | 0.614089  | -0.432553 |
| 37 | 1  | 0 | 2.269501  | 4.295095  | 1.471980  |
| 38 | 1  | 0 | 3.950615  | 5.631994  | 0.195131  |
| 39 | 1  | 0 | 5.298058  | 4.540041  | -1.592735 |
| 40 | 1  | 0 | 4.958355  | 2.123934  | -2.087917 |
| 41 | 1  | 0 | 3.294125  | 0.816754  | -0.822218 |
| 42 | 17 | 0 | -4.152376 | -2.791187 | 0.438780  |
| 43 | 17 | 0 | -1.482983 | 2.803601  | -0.866461 |

---

|                                              |                             |
|----------------------------------------------|-----------------------------|
| Zero-point correction=                       | 0.282428 (Hartree/Particle) |
| Thermal correction to Energy=                | 0.310644                    |
| Thermal correction to Enthalpy=              | 0.311589                    |
| Thermal correction to Gibbs Free Energy=     | 0.217744                    |
| Sum of electronic and zero-point Energies=   | -2710.526341                |
| Sum of electronic and thermal Energies=      | -2710.498124                |
| Sum of electronic and thermal Enthalpies=    | -2710.497180                |
| Sum of electronic and thermal Free Energies= | -2710.591025                |

#### IN<sub>4</sub> in Fig. 4A

---

| Center<br>Number | Atomic<br>Number | Atomic<br>Type | Coordinates (Angstroms) |           |           |
|------------------|------------------|----------------|-------------------------|-----------|-----------|
|                  |                  |                | X                       | Y         | Z         |
| 1                | 7                | 0              | -1.286906               | -0.419669 | 0.122743  |
| 2                | 6                | 0              | -2.307966               | -1.038603 | -0.469895 |
| 3                | 8                | 0              | -2.342661               | -1.961785 | -1.322352 |
| 4                | 6                | 0              | -3.630245               | -0.457510 | 0.030346  |
| 5                | 8                | 0              | -0.050591               | -1.053713 | -0.281989 |
| 6                | 6                | 0              | 1.049720                | -0.325611 | -0.193261 |
| 7                | 6                | 0              | -3.723810               | 0.646467  | 0.896973  |
| 8                | 6                | 0              | -4.970019               | 1.127418  | 1.306153  |
| 9                | 6                | 0              | -6.150513               | 0.516477  | 0.860971  |
| 10               | 6                | 0              | -6.065913               | -0.579928 | -0.003703 |
| 11               | 6                | 0              | -4.817470               | -1.057247 | -0.415419 |

|    |    |   |           |           |           |
|----|----|---|-----------|-----------|-----------|
| 12 | 6  | 0 | 1.204320  | 1.033907  | -0.323886 |
| 13 | 6  | 0 | 2.500384  | 1.684253  | -0.135805 |
| 14 | 6  | 0 | 3.750689  | 0.804243  | 0.202106  |
| 15 | 6  | 0 | 3.531472  | -0.589643 | 0.227774  |
| 16 | 6  | 0 | 2.277701  | -1.239025 | 0.052131  |
| 17 | 17 | 0 | -0.091460 | 2.120719  | -0.845844 |
| 18 | 8  | 0 | 2.657284  | 2.898733  | -0.249364 |
| 19 | 17 | 0 | 4.934084  | -1.636207 | 0.542683  |
| 20 | 8  | 0 | 2.086916  | -2.464268 | 0.097720  |
| 21 | 1  | 0 | -2.805961 | 1.116422  | 1.232975  |
| 22 | 1  | 0 | -5.021803 | 1.986041  | 1.973570  |
| 23 | 1  | 0 | -7.120296 | 0.893446  | 1.181480  |
| 24 | 1  | 0 | -6.974895 | -1.062906 | -0.360004 |
| 25 | 1  | 0 | -4.719159 | -1.901489 | -1.091598 |
| 26 | 8  | 0 | 4.828520  | 1.395815  | 0.399885  |

---

Zero-point correction= 0.154554 (Hartree/Particle)  
 Thermal correction to Energy= 0.172868  
 Thermal correction to Enthalpy= 0.173812  
 Thermal correction to Gibbs Free Energy= 0.104145  
 Sum of electronic and zero-point Energies= -1849.527451  
 Sum of electronic and thermal Energies= -1849.509137  
 Sum of electronic and thermal Enthalpies= -1849.508192  
 Sum of electronic and thermal Free Energies= -1849.577860

**TS<sub>4</sub> in Fig. 4A**

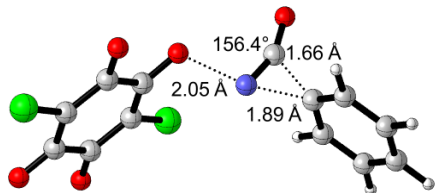


---

| Center Number | Atomic Number | Atomic Type | Coordinates (Angstroms) |           |          |
|---------------|---------------|-------------|-------------------------|-----------|----------|
|               |               |             | X                       | Y         | Z        |
| 1             | 7             | 0           | 1.684370                | -0.487179 | 0.476246 |
| 2             | 6             | 0           | 2.571120                | -0.489028 | 1.380006 |
| 3             | 8             | 0           | 3.006274                | -0.520446 | 2.520248 |
| 4             | 6             | 0           | 3.511259                | -0.373697 | 0.011595 |
| 5             | 8             | 0           | -0.133635               | -0.693115 | 1.404174 |

|    |    |   |           |           |           |
|----|----|---|-----------|-----------|-----------|
| 6  | 6  | 0 | -1.126202 | -0.211869 | 0.772161  |
| 7  | 6  | 0 | 3.953235  | 0.892262  | -0.402091 |
| 8  | 6  | 0 | 5.016806  | 0.998689  | -1.299550 |
| 9  | 6  | 0 | 5.640046  | -0.153126 | -1.797619 |
| 10 | 6  | 0 | 5.186352  | -1.416359 | -1.395342 |
| 11 | 6  | 0 | 4.122622  | -1.528768 | -0.498664 |
| 12 | 6  | 0 | -1.305825 | 1.125325  | 0.414783  |
| 13 | 6  | 0 | -2.451394 | 1.641447  | -0.289427 |
| 14 | 6  | 0 | -3.587653 | 0.628438  | -0.683196 |
| 15 | 6  | 0 | -3.388534 | -0.717833 | -0.296416 |
| 16 | 6  | 0 | -2.253755 | -1.235641 | 0.386944  |
| 17 | 17 | 0 | -0.069148 | 2.314505  | 0.890279  |
| 18 | 8  | 0 | -2.602164 | 2.831406  | -0.591010 |
| 19 | 17 | 0 | -4.680094 | -1.882545 | -0.711668 |
| 20 | 8  | 0 | -2.079418 | -2.423891 | 0.705036  |
| 21 | 1  | 0 | 3.443869  | 1.774709  | -0.027466 |
| 22 | 1  | 0 | 5.352483  | 1.981538  | -1.623235 |
| 23 | 1  | 0 | 6.463133  | -0.067557 | -2.503336 |
| 24 | 1  | 0 | 5.656629  | -2.314286 | -1.791067 |
| 25 | 1  | 0 | 3.750894  | -2.502399 | -0.193174 |
| 26 | 8  | 0 | -4.572178 | 1.085534  | -1.294813 |

**DDBQO<sup>-2</sup> in Fig. 4A**

| Center<br>Number | Atomic<br>Number | Atomic<br>Type | Coordinates (Angstroms) |           |           |
|------------------|------------------|----------------|-------------------------|-----------|-----------|
|                  |                  |                | X                       | Y         | Z         |
| 1                | 6                | 0              | -1.430301               | 0.000493  | 0.000170  |
| 2                | 6                | 0              | -0.789367               | -1.265905 | 0.000093  |
| 3                | 6                | 0              | 0.790046                | -1.266486 | 0.000421  |
| 4                | 6                | 0              | 1.430301                | -0.000493 | 0.000164  |
| 5                | 6                | 0              | 0.789367                | 1.265905  | 0.000127  |
| 6                | 6                | 0              | -0.790046               | 1.266486  | 0.000479  |
| 7                | 8                | 0              | -1.363295               | 2.373656  | -0.000138 |
| 8                | 8                | 0              | 1.363295                | -2.373656 | -0.000027 |
| 9                | 17               | 0              | -3.229822               | -0.000313 | -0.000190 |
| 10               | 8                | 0              | -1.363853               | -2.372224 | -0.000112 |
| 11               | 17               | 0              | 3.229821                | 0.000313  | -0.000166 |
| 12               | 8                | 0              | 1.363854                | 2.372224  | -0.000057 |

---

|                                              |                             |
|----------------------------------------------|-----------------------------|
| Zero-point correction=                       | 0.049197 (Hartree/Particle) |
| Thermal correction to Energy=                | 0.059690                    |
| Thermal correction to Enthalpy=              | 0.060634                    |
| Thermal correction to Gibbs Free Energy=     | 0.011482                    |
| Sum of electronic and zero-point Energies=   | -1449.918278                |
| Sum of electronic and thermal Energies=      | -1449.907785                |
| Sum of electronic and thermal Enthalpies=    | -1449.906841                |
| Sum of electronic and thermal Free Energies= | -1449.955993                |

### DCBQ in Fig. 4B1

---

| Center<br>Number | Atomic<br>Number | Atomic<br>Type | Coordinates (Angstroms) |           |           |
|------------------|------------------|----------------|-------------------------|-----------|-----------|
|                  |                  |                | X                       | Y         | Z         |
| 1                | 6                | 0              | -1.413420               | -0.269788 | 0.000183  |
| 2                | 6                | 0              | -0.571430               | -1.318678 | 0.000016  |
| 3                | 6                | 0              | 1.413356                | 0.269788  | 0.000026  |
| 4                | 6                | 0              | 0.571437                | 1.318708  | 0.000215  |
| 5                | 6                | 0              | 0.899085                | -1.144492 | 0.000003  |
| 6                | 8                | 0              | 1.647538                | -2.108044 | 0.000244  |
| 7                | 6                | 0              | -0.899105               | 1.144511  | 0.000860  |
| 8                | 8                | 0              | -1.647555               | 2.108051  | -0.000226 |
| 9                | 17               | 0              | -3.131229               | -0.469432 | -0.000218 |
| 10               | 17               | 0              | 3.131262                | 0.469408  | -0.000242 |
| 11               | 1                | 0              | -0.921924               | -2.345037 | -0.000269 |
| 12               | 1                | 0              | 0.921963                | 2.345082  | 0.000120  |

---

|                                              |                             |
|----------------------------------------------|-----------------------------|
| Zero-point correction=                       | 0.065906 (Hartree/Particle) |
| Thermal correction to Energy=                | 0.074528                    |
| Thermal correction to Enthalpy=              | 0.075472                    |
| Thermal correction to Gibbs Free Energy=     | 0.030916                    |
| Sum of electronic and zero-point Energies=   | -1300.591387                |
| Sum of electronic and thermal Energies=      | -1300.582764                |
| Sum of electronic and thermal Enthalpies=    | -1300.581820                |
| Sum of electronic and thermal Free Energies= | -1300.626376                |

### TS<sub>1</sub> in Fig. 4B1

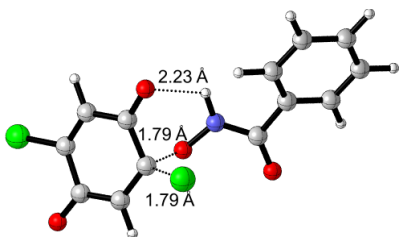

| Center Number | Atomic Number | Atomic Type | Coordinates (Angstroms) |           |           |
|---------------|---------------|-------------|-------------------------|-----------|-----------|
|               |               |             | X                       | Y         | Z         |
| 1             | 6             | 0           | -2.599426               | 1.452753  | 0.010493  |
| 2             | 6             | 0           | -3.634514               | 0.631227  | -0.245766 |
| 3             | 6             | 0           | -3.612978               | -0.871078 | 0.002650  |
| 4             | 6             | 0           | -2.388185               | -1.374555 | 0.503110  |
| 5             | 6             | 0           | -1.234514               | -0.583186 | 0.651511  |
| 6             | 6             | 0           | -1.352360               | 0.924521  | 0.577820  |
| 7             | 8             | 0           | -0.438925               | 1.682897  | 0.912161  |
| 8             | 8             | 0           | -4.648809               | -1.532655 | -0.210844 |
| 9             | 8             | 0           | -0.310034               | -0.655353 | -0.877080 |
| 10            | 7             | 0           | 0.946926                | -0.145381 | -0.809665 |
| 11            | 6             | 0           | 2.070487                | -0.918015 | -0.752008 |
| 12            | 8             | 0           | 2.113017                | -2.124481 | -0.989979 |
| 13            | 6             | 0           | 3.326264                | -0.130962 | -0.447829 |
| 14            | 6             | 0           | 4.528343                | -0.569761 | -1.022018 |
| 15            | 6             | 0           | 5.724716                | 0.097510  | -0.759599 |
| 16            | 6             | 0           | 5.738377                | 1.203947  | 0.097656  |
| 17            | 6             | 0           | 4.548573                | 1.632384  | 0.692124  |
| 18            | 6             | 0           | 3.346733                | 0.970582  | 0.422529  |
| 19            | 1             | 0           | 0.990624                | 0.842566  | -0.577350 |
| 20            | 1             | 0           | 4.500712                | -1.443575 | -1.665284 |
| 21            | 1             | 0           | 6.648243                | -0.246897 | -1.218264 |
| 22            | 1             | 0           | 6.671129                | 1.721212  | 0.307746  |
| 23            | 1             | 0           | 4.553498                | 2.477538  | 1.375411  |
| 24            | 1             | 0           | 2.434679                | 1.293350  | 0.917114  |
| 25            | 17            | 0           | -0.048456               | -1.144604 | 1.875574  |
| 26            | 1             | 0           | -2.326025               | -2.440731 | 0.683477  |
| 27            | 1             | 0           | -2.646798               | 2.525878  | -0.139908 |
| 28            | 17            | 0           | -5.124817               | 1.293596  | -0.879891 |

Zero-point correction= 0.184869 (Hartree/Particle)  
 Thermal correction to Energy= 0.202443

|                                              |              |
|----------------------------------------------|--------------|
| Thermal correction to Enthalpy=              | 0.203387     |
| Thermal correction to Gibbs Free Energy=     | 0.136940     |
| Sum of electronic and zero-point Energies=   | -1776.087412 |
| Sum of electronic and thermal Energies=      | -1776.069838 |
| Sum of electronic and thermal Enthalpies=    | -1776.068894 |
| Sum of electronic and thermal Free Energies= | -1776.135340 |

**IN<sub>1</sub>(P<sub>1</sub>) in Fig. 4B1**

| Center<br>Number | Atomic<br>Number | Atomic<br>Type | Coordinates (Angstroms) |           |           |
|------------------|------------------|----------------|-------------------------|-----------|-----------|
|                  |                  |                | X                       | Y         | Z         |
| 1                | 6                | 0              | 2.888203                | -1.371548 | 0.163306  |
| 2                | 6                | 0              | 3.750853                | -0.428477 | -0.258076 |
| 3                | 6                | 0              | 3.413218                | 1.042751  | -0.183942 |
| 4                | 6                | 0              | 2.076505                | 1.390108  | 0.335058  |
| 5                | 6                | 0              | 1.208902                | 0.444470  | 0.738791  |
| 6                | 6                | 0              | 1.580401                | -1.009983 | 0.747230  |
| 7                | 8                | 0              | 0.848980                | -1.855684 | 1.248701  |
| 8                | 8                | 0              | 4.200404                | 1.898157  | -0.555258 |
| 9                | 8                | 0              | 0.024397                | 0.817409  | 1.310661  |
| 10               | 7                | 0              | -1.079011               | 0.111637  | 0.778318  |
| 11               | 6                | 0              | -2.033135               | 0.929117  | 0.167105  |
| 12               | 8                | 0              | -1.806615               | 2.086357  | -0.140806 |
| 13               | 6                | 0              | -3.328895               | 0.230999  | -0.122956 |
| 14               | 6                | 0              | -4.459212               | 1.036451  | -0.326220 |
| 15               | 6                | 0              | -5.695730               | 0.452432  | -0.596974 |
| 16               | 6                | 0              | -5.811800               | -0.939147 | -0.677087 |
| 17               | 6                | 0              | -4.685771               | -1.745631 | -0.490372 |
| 18               | 6                | 0              | -3.446330               | -1.165549 | -0.213381 |
| 19               | 1                | 0              | -1.377680               | -0.596564 | 1.440094  |
| 20               | 1                | 0              | -4.347396               | 2.114117  | -0.271069 |
| 21               | 1                | 0              | -6.568007               | 1.081336  | -0.747772 |
| 22               | 1                | 0              | -6.774832               | -1.393161 | -0.891627 |
| 23               | 1                | 0              | -4.769053               | -2.825405 | -0.569153 |
| 24               | 1                | 0              | -2.573034               | -1.801570 | -0.103614 |
| 25               | 17               | 0              | 5.302730                | -0.831655 | -0.905767 |
| 26               | 1                | 0              | 3.120045                | -2.430528 | 0.127942  |
| 27               | 1                | 0              | 1.816047                | 2.442576  | 0.363736  |

|                                              |                             |
|----------------------------------------------|-----------------------------|
| Zero-point correction=                       | 0.186726 (Hartree/Particle) |
| Thermal correction to Energy=                | 0.202970                    |
| Thermal correction to Enthalpy=              | 0.203914                    |
| Thermal correction to Gibbs Free Energy=     | 0.139695                    |
| Sum of electronic and zero-point Energies=   | -1315.812782                |
| Sum of electronic and thermal Energies=      | -1315.796538                |
| Sum of electronic and thermal Enthalpies=    | -1315.795594                |
| Sum of electronic and thermal Free Energies= | -1315.859813                |

**TS<sub>1a</sub> in Fig. 4B1**

| Center<br>Number | Atomic<br>Number | Atomic<br>Type | Coordinates (Angstroms) |           |           |
|------------------|------------------|----------------|-------------------------|-----------|-----------|
|                  |                  |                | X                       | Y         | Z         |
| 1                | 6                | 0              | -2.736135               | -1.947357 | 0.349696  |
| 2                | 6                | 0              | -4.030078               | -1.612492 | 0.509520  |
| 3                | 6                | 0              | -4.611106               | -0.372063 | -0.109924 |
| 4                | 6                | 0              | -3.671578               | 0.480936  | -0.843019 |
| 5                | 6                | 0              | -2.366505               | 0.162062  | -1.007638 |
| 6                | 6                | 0              | -1.825594               | -1.130739 | -0.480753 |
| 7                | 8                | 0              | -0.698257               | -1.546380 | -0.746302 |
| 8                | 8                | 0              | -5.802464               | -0.093642 | 0.009389  |
| 9                | 8                | 0              | -1.562808               | 0.948453  | -1.770094 |
| 10               | 7                | 0              | -0.443999               | 1.437682  | -0.999029 |
| 11               | 6                | 0              | -0.714420               | 2.639671  | -0.401418 |
| 12               | 8                | 0              | -1.844108               | 3.136200  | -0.331412 |
| 13               | 6                | 0              | 0.469246                | 3.308840  | 0.263825  |
| 14               | 6                | 0              | 0.176096                | 4.364669  | 1.141979  |
| 15               | 6                | 0              | 1.200453                | 5.043804  | 1.801143  |
| 16               | 6                | 0              | 2.534241                | 4.677748  | 1.585796  |
| 17               | 6                | 0              | 2.831547                | 3.633593  | 0.706496  |
| 18               | 6                | 0              | 1.808525                | 2.948344  | 0.044246  |
| 19               | 1                | 0              | 0.519372                | 1.099240  | -1.498064 |
| 20               | 1                | 0              | -0.864446               | 4.635497  | 1.287422  |
| 21               | 1                | 0              | 0.959605                | 5.857232  | 2.481366  |
| 22               | 1                | 0              | 3.334850                | 5.205002  | 2.099387  |
| 23               | 1                | 0              | 3.860782                | 3.337144  | 0.525605  |
| 24               | 1                | 0              | 2.072866                | 2.152587  | -0.648160 |
| 25               | 17               | 0              | -5.117319               | -2.609056 | 1.440578  |
| 26               | 1                | 0              | -2.310374               | -2.847302 | 0.780129  |

|    |   |   |           |           |           |
|----|---|---|-----------|-----------|-----------|
| 27 | 1 | 0 | -4.053433 | 1.415837  | -1.236071 |
| 28 | 8 | 0 | 1.679665  | 0.613515  | -2.101306 |
| 29 | 7 | 0 | 2.010080  | -0.512094 | -1.434513 |
| 30 | 6 | 0 | 3.220938  | -0.702068 | -0.858723 |
| 31 | 8 | 0 | 4.138026  | 0.135229  | -0.859221 |
| 32 | 6 | 0 | 3.403717  | -2.047062 | -0.193371 |
| 33 | 6 | 0 | 4.395823  | -2.141225 | 0.795505  |
| 34 | 6 | 0 | 4.636762  | -3.346750 | 1.454884  |
| 35 | 6 | 0 | 3.896101  | -4.488052 | 1.128667  |
| 36 | 6 | 0 | 2.917489  | -4.409917 | 0.133445  |
| 37 | 6 | 0 | 2.674930  | -3.201563 | -0.525047 |
| 38 | 1 | 0 | 1.238830  | -1.150430 | -1.261129 |
| 39 | 1 | 0 | 4.969769  | -1.248617 | 1.021903  |
| 40 | 1 | 0 | 5.404729  | -3.397763 | 2.222903  |
| 41 | 1 | 0 | 4.084624  | -5.429458 | 1.638499  |
| 42 | 1 | 0 | 2.345627  | -5.293309 | -0.139229 |
| 43 | 1 | 0 | 1.925915  | -3.170081 | -1.309872 |

---

|                                              |                             |
|----------------------------------------------|-----------------------------|
| Zero-point correction=                       | 0.302040 (Hartree/Particle) |
| Thermal correction to Energy=                | 0.327639                    |
| Thermal correction to Enthalpy=              | 0.328584                    |
| Thermal correction to Gibbs Free Energy=     | 0.240346                    |
| Sum of electronic and zero-point Energies=   | -1791.329888                |
| Sum of electronic and thermal Energies=      | -1791.304288                |
| Sum of electronic and thermal Enthalpies=    | -1791.303344                |
| Sum of electronic and thermal Free Energies= | -1791.391581                |

### IN<sub>2</sub> in Fig. 4B1

---

| Center<br>Number | Atomic<br>Number | Atomic<br>Type | Coordinates (Angstroms) |           |           |
|------------------|------------------|----------------|-------------------------|-----------|-----------|
|                  |                  |                | X                       | Y         | Z         |
| 1                | 6                | 0              | -3.688171               | 1.050268  | 0.000127  |
| 2                | 6                | 0              | -3.895707               | -0.276611 | 0.000019  |
| 3                | 6                | 0              | -2.761815               | -1.281374 | -0.000108 |
| 4                | 6                | 0              | -1.432179               | -0.728434 | -0.000203 |
| 5                | 6                | 0              | -1.189089               | 0.626005  | -0.000057 |
| 6                | 6                | 0              | -2.318365               | 1.615280  | 0.000069  |
| 7                | 8                | 0              | -2.154789               | 2.831028  | 0.000120  |
| 8                | 8                | 0              | -3.012204               | -2.493238 | -0.000133 |



|    |    |   |           |           |           |
|----|----|---|-----------|-----------|-----------|
| 9  | 8  | 0 | -0.004672 | 1.205796  | -0.000044 |
| 10 | 7  | 0 | 1.089069  | 0.294230  | -0.000050 |
| 11 | 6  | 0 | 2.233200  | 1.014674  | -0.000037 |
| 12 | 8  | 0 | 2.389523  | 2.250413  | -0.000064 |
| 13 | 6  | 0 | 3.453843  | 0.104251  | -0.000006 |
| 14 | 6  | 0 | 4.716777  | 0.712811  | -0.000103 |
| 15 | 6  | 0 | 5.882555  | -0.057054 | -0.000057 |
| 16 | 6  | 0 | 5.802846  | -1.453256 | 0.000088  |
| 17 | 6  | 0 | 4.546223  | -2.069689 | 0.000180  |
| 18 | 6  | 0 | 3.381346  | -1.298682 | 0.000135  |
| 19 | 1  | 0 | 4.750786  | 1.797749  | -0.000208 |
| 20 | 1  | 0 | 6.854025  | 0.432391  | -0.000131 |
| 21 | 1  | 0 | 6.708565  | -2.055344 | 0.000131  |
| 22 | 1  | 0 | 4.473112  | -3.154875 | 0.000297  |
| 23 | 1  | 0 | 2.406903  | -1.773599 | 0.000201  |
| 24 | 17 | 0 | -5.520387 | -0.926863 | 0.000047  |
| 25 | 1  | 0 | -4.498584 | 1.771208  | 0.000224  |
| 26 | 1  | 0 | -0.603362 | -1.421601 | -0.000282 |

---

Zero-point correction= 0.172915 (Hartree/Particle)  
 Thermal correction to Energy= 0.188947  
 Thermal correction to Enthalpy= 0.189891  
 Thermal correction to Gibbs Free Energy= 0.125595  
 Sum of electronic and zero-point Energies= -1315.313781  
 Sum of electronic and thermal Energies= -1315.297749  
 Sum of electronic and thermal Enthalpies= -1315.296805  
 Sum of electronic and thermal Free Energies= -1315.361100

**TS<sub>2</sub> in Fig. 4B1**

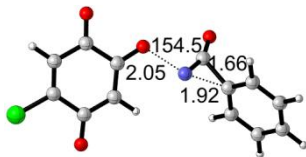


---

| Center Number | Atomic Number | Atomic Type | Coordinates (Angstroms) |          |           |
|---------------|---------------|-------------|-------------------------|----------|-----------|
|               |               |             | X                       | Y        | Z         |
| 1             | 7             | 0           | 1.528502                | 0.596855 | 0.116615  |
| 2             | 6             | 0           | 2.344943                | 1.273656 | -0.583472 |
| 3             | 8             | 0           | 2.666904                | 2.192542 | -1.314555 |

|    |    |   |           |           |           |
|----|----|---|-----------|-----------|-----------|
| 4  | 6  | 0 | 3.377231  | 0.090653  | -0.056399 |
| 5  | 8  | 0 | -0.231960 | 1.640179  | 0.009544  |
| 6  | 6  | 0 | -1.269581 | 0.911765  | 0.033022  |
| 7  | 6  | 0 | 3.655898  | -0.990086 | -0.902125 |
| 8  | 6  | 0 | 4.774720  | -1.788605 | -0.658347 |
| 9  | 6  | 0 | 5.606798  | -1.518209 | 0.434341  |
| 10 | 6  | 0 | 5.315142  | -0.446547 | 1.286643  |
| 11 | 6  | 0 | 4.197096  | 0.354200  | 1.047786  |
| 12 | 6  | 0 | -1.330687 | -0.479508 | -0.073045 |
| 13 | 6  | 0 | -2.536628 | -1.241887 | -0.067513 |
| 14 | 6  | 0 | -3.829484 | -0.445459 | 0.070322  |
| 15 | 6  | 0 | -3.858597 | 0.890313  | 0.189913  |
| 16 | 6  | 0 | -2.601239 | 1.674373  | 0.200450  |
| 17 | 8  | 0 | -2.603950 | -2.478255 | -0.168718 |
| 18 | 8  | 0 | -2.643241 | 2.889230  | 0.342167  |
| 19 | 1  | 0 | 2.995663  | -1.196935 | -1.738753 |
| 20 | 1  | 0 | 4.992390  | -2.627887 | -1.313870 |
| 21 | 1  | 0 | 6.473213  | -2.145643 | 0.626234  |
| 22 | 1  | 0 | 5.953851  | -0.242347 | 2.142262  |
| 23 | 1  | 0 | 3.951330  | 1.180071  | 1.708313  |
| 24 | 17 | 0 | -5.320998 | -1.366141 | 0.068274  |
| 25 | 1  | 0 | -0.404025 | -1.032006 | -0.169438 |
| 26 | 1  | 0 | -4.780663 | 1.453622  | 0.291325  |

---

|                                              |                             |
|----------------------------------------------|-----------------------------|
| Zero-point correction=                       | 0.168526 (Hartree/Particle) |
| Thermal correction to Energy=                | 0.185442                    |
| Thermal correction to Enthalpy=              | 0.186386                    |
| Thermal correction to Gibbs Free Energy=     | 0.118610                    |
| Sum of electronic and zero-point Energies=   | -1315.277579                |
| Sum of electronic and thermal Energies=      | -1315.260663                |
| Sum of electronic and thermal Enthalpies=    | -1315.259719                |
| Sum of electronic and thermal Free Energies= | -1315.327496                |

**CBQO` in Fig. 4B1**

---

| Center<br>Number | Atomic<br>Number | Atomic<br>Type | Coordinates (Angstroms) |           |           |
|------------------|------------------|----------------|-------------------------|-----------|-----------|
|                  |                  |                | X                       | Y         | Z         |
| 1                | 6                | 0              | -0.948861               | -0.304858 | 0.000057  |
| 2                | 6                | 0              | 0.767791                | 1.494830  | -0.000032 |

|    |    |   |           |           |           |
|----|----|---|-----------|-----------|-----------|
| 3  | 6  | 0 | 1.825762  | 0.553536  | -0.000047 |
| 4  | 6  | 0 | -0.026340 | -1.280824 | 0.000112  |
| 5  | 1  | 0 | 1.029807  | 2.548974  | -0.000166 |
| 6  | 1  | 0 | -0.285469 | -2.335157 | 0.000054  |
| 7  | 8  | 0 | 3.045695  | 0.817386  | -0.000123 |
| 8  | 17 | 0 | -2.657541 | -0.720086 | -0.000101 |
| 9  | 6  | 0 | 1.416922  | -0.946345 | 0.000311  |
| 10 | 8  | 0 | 2.248458  | -1.847537 | -0.000098 |
| 11 | 6  | 0 | -0.614357 | 1.185492  | 0.000108  |
| 12 | 8  | 0 | -1.555608 | 2.007233  | 0.000068  |

---

|                                              |                             |
|----------------------------------------------|-----------------------------|
| Zero-point correction=                       | 0.066555 (Hartree/Particle) |
| Thermal correction to Energy=                | 0.074882                    |
| Thermal correction to Enthalpy=              | 0.075826                    |
| Thermal correction to Gibbs Free Energy=     | 0.032229                    |
| Sum of electronic and zero-point Energies=   | -915.713771                 |
| Sum of electronic and thermal Energies=      | -915.705445                 |
| Sum of electronic and thermal Enthalpies=    | -915.704500                 |
| Sum of electronic and thermal Free Energies= | -915.748097                 |

### TS<sub>2</sub> in Fig. 4B2

---

| Center<br>Number | Atomic<br>Number | Atomic<br>Type | Coordinates (Angstroms) |           |           |
|------------------|------------------|----------------|-------------------------|-----------|-----------|
|                  |                  |                | X                       | Y         | Z         |
| 1                | 6                | 0              | 0.093215                | 2.408011  | -0.336693 |
| 2                | 6                | 0              | -1.184721               | 2.018597  | 0.064573  |
| 3                | 6                | 0              | -1.382833               | 0.925710  | 1.069953  |
| 4                | 6                | 0              | -0.212147               | 0.098010  | 1.325966  |
| 5                | 6                | 0              | 1.010445                | 0.427959  | 0.842484  |
| 6                | 6                | 0              | 1.232068                | 1.639588  | -0.022025 |
| 7                | 8                | 0              | 2.408827                | 1.946096  | -0.396608 |
| 8                | 8                | 0              | -2.479709               | 0.719805  | 1.598319  |
| 9                | 8                | 0              | 2.059024                | -0.336900 | 1.282712  |
| 10               | 7                | 0              | 3.202981                | -0.311264 | 0.449057  |
| 11               | 6                | 0              | 4.271823                | -0.997714 | 0.941489  |
| 12               | 8                | 0              | 4.249593                | -1.721366 | 1.936071  |
| 13               | 6                | 0              | 5.521327                | -0.832565 | 0.105133  |
| 14               | 6                | 0              | 6.720193                | -1.311297 | 0.651872  |
| 15               | 6                | 0              | 7.918371                | -1.191387 | -0.052876 |

|    |    |   |           |           |           |
|----|----|---|-----------|-----------|-----------|
| 16 | 6  | 0 | 7.931588  | -0.594490 | -1.317658 |
| 17 | 6  | 0 | 6.738581  | -0.121680 | -1.871966 |
| 18 | 6  | 0 | 5.538231  | -0.240176 | -1.167625 |
| 19 | 1  | 0 | 6.683421  | -1.777136 | 1.631124  |
| 20 | 1  | 0 | 8.841461  | -1.563832 | 0.383643  |
| 21 | 1  | 0 | 8.863696  | -0.501594 | -1.868965 |
| 22 | 1  | 0 | 6.738387  | 0.336650  | -2.857077 |
| 23 | 1  | 0 | 4.619732  | 0.118720  | -1.620332 |
| 24 | 17 | 0 | -2.451621 | 3.262984  | 0.027712  |
| 25 | 8  | 0 | -1.859631 | 0.846247  | -1.341809 |
| 26 | 7  | 0 | -3.087924 | 0.370169  | -1.142978 |
| 27 | 6  | 0 | -3.353725 | -0.933050 | -0.802839 |
| 28 | 8  | 0 | -2.522075 | -1.837539 | -0.835649 |
| 29 | 6  | 0 | -4.802508 | -1.186671 | -0.467709 |
| 30 | 6  | 0 | -5.389195 | -2.378015 | -0.918462 |
| 31 | 6  | 0 | -6.721711 | -2.665841 | -0.622258 |
| 32 | 6  | 0 | -7.479261 | -1.772859 | 0.144403  |
| 33 | 6  | 0 | -6.891780 | -0.597174 | 0.619689  |
| 34 | 6  | 0 | -5.558918 | -0.303043 | 0.317423  |
| 35 | 1  | 0 | -3.831436 | 1.061704  | -1.118409 |
| 36 | 1  | 0 | -4.781110 | -3.069654 | -1.493236 |
| 37 | 1  | 0 | -7.169178 | -3.588317 | -0.983518 |
| 38 | 1  | 0 | -8.515714 | -1.999630 | 0.381048  |
| 39 | 1  | 0 | -7.465368 | 0.086106  | 1.240508  |
| 40 | 1  | 0 | -5.087272 | 0.582516  | 0.733421  |
| 41 | 1  | 0 | 3.240473  | 0.633984  | -0.009603 |
| 42 | 1  | 0 | 0.235354  | 3.282791  | -0.959012 |
| 43 | 1  | 0 | -0.342785 | -0.767603 | 1.965215  |

---

|                                              |                             |
|----------------------------------------------|-----------------------------|
| Zero-point correction=                       | 0.305127 (Hartree/Particle) |
| Thermal correction to Energy=                | 0.330202                    |
| Thermal correction to Enthalpy=              | 0.331147                    |
| Thermal correction to Gibbs Free Energy=     | 0.245443                    |
| Sum of electronic and zero-point Energies=   | -1791.319251                |
| Sum of electronic and thermal Energies=      | -1791.294176                |
| Sum of electronic and thermal Enthalpies=    | -1791.293232                |
| Sum of electronic and thermal Free Energies= | -1791.378935                |

**IN<sub>2</sub>(P<sub>2</sub>) in Fig. 4B2**

---

| Center<br>Number | Atomic<br>Number | Atomic<br>Type | Coordinates (Angstroms) |           |           |
|------------------|------------------|----------------|-------------------------|-----------|-----------|
|                  |                  |                | X                       | Y         | Z         |
| 1                | 6                | 0              | -0.404535               | -1.700008 | 1.388587  |
| 2                | 6                | 0              | -1.358280               | -1.675193 | 0.438434  |
| 3                | 6                | 0              | -1.019593               | -1.767456 | -1.028226 |
| 4                | 6                | 0              | 0.404708                | -1.699485 | -1.389211 |
| 5                | 6                | 0              | 1.358453                | -1.675143 | -0.439047 |
| 6                | 6                | 0              | 1.019760                | -1.767965 | 1.027580  |
| 7                | 8                | 0              | 1.900950                | -1.907922 | 1.868601  |
| 8                | 8                | 0              | -1.900807               | -1.906910 | -1.869310 |
| 9                | 8                | 0              | 2.671421                | -1.742073 | -0.807837 |
| 10               | 7                | 0              | 3.479084                | -0.803288 | -0.124869 |
| 11               | 6                | 0              | 4.190707                | 0.049468  | -0.970784 |
| 12               | 8                | 0              | 3.934212                | 0.168504  | -2.156478 |
| 13               | 6                | 0              | 5.254274                | 0.841567  | -0.268529 |
| 14               | 6                | 0              | 6.284273                | 1.373818  | -1.058063 |
| 15               | 6                | 0              | 7.304010                | 2.119682  | -0.468728 |
| 16               | 6                | 0              | 7.298067                | 2.348939  | 0.911109  |
| 17               | 6                | 0              | 6.266186                | 1.833461  | 1.700106  |
| 18               | 6                | 0              | 5.245985                | 1.080584  | 1.115269  |
| 19               | 1                | 0              | 3.955991                | -1.260807 | 0.644830  |
| 20               | 1                | 0              | 6.265863                | 1.195288  | -2.127971 |
| 21               | 1                | 0              | 8.101669                | 2.524274  | -1.084548 |
| 22               | 1                | 0              | 8.090928                | 2.933408  | 1.368720  |
| 23               | 1                | 0              | 6.248851                | 2.024654  | 2.768829  |
| 24               | 1                | 0              | 4.432637                | 0.713402  | 1.733925  |
| 25               | 8                | 0              | -2.671243               | -1.742170 | 0.807208  |
| 26               | 7                | 0              | -3.478889               | -0.803116 | 0.124579  |
| 27               | 1                | 0              | -3.955528               | -1.260271 | -0.645504 |
| 28               | 6                | 0              | -4.190864               | 0.049002  | 0.970848  |
| 29               | 8                | 0              | -3.934696               | 0.167332  | 2.156679  |
| 30               | 6                | 0              | -5.254420               | 0.841336  | 0.268834  |
| 31               | 6                | 0              | -5.245799               | 1.081291  | -1.114801 |
| 32               | 6                | 0              | -6.284655               | 1.372975  | 1.058471  |
| 33               | 6                | 0              | -6.265911               | 1.834485  | -1.699384 |
| 34               | 1                | 0              | -4.432130               | 0.714810  | -1.733449 |
| 35               | 6                | 0              | -7.304346               | 2.119086  | 0.469371  |
| 36               | 1                | 0              | -6.266476               | 1.193770  | 2.128270  |
| 37               | 6                | 0              | -7.298110               | 2.349219  | -0.910319 |
| 38               | 1                | 0              | -6.248432               | 2.026240  | -2.768004 |

|    |   |   |           |           |           |
|----|---|---|-----------|-----------|-----------|
| 39 | 1 | 0 | -8.102236 | 2.523134  | 1.085250  |
| 40 | 1 | 0 | -8.090843 | 2.934029  | -1.367714 |
| 41 | 1 | 0 | 0.657387  | -1.684113 | -2.443867 |
| 42 | 1 | 0 | -0.657212 | -1.685044 | 2.443250  |

---

|                                              |                             |
|----------------------------------------------|-----------------------------|
| Zero-point correction=                       | 0.307413 (Hartree/Particle) |
| Thermal correction to Energy=                | 0.331320                    |
| Thermal correction to Enthalpy=              | 0.332265                    |
| Thermal correction to Gibbs Free Energy=     | 0.248319                    |
| Sum of electronic and zero-point Energies=   | -1331.034761                |
| Sum of electronic and thermal Energies=      | -1331.010853                |
| Sum of electronic and thermal Enthalpies=    | -1331.009909                |
| Sum of electronic and thermal Free Energies= | -1331.093855                |
